1 **Dual functions of *ZmGII* in the photoperiodic flowering pathway and salt stress**  
2 **responses in maize**

3 Fengkai Wu<sup>1,2,3,+</sup>, Ling Liu<sup>1,2,3,+</sup>, Yan Kang<sup>1,2,3,+</sup>, Jing Li<sup>1,2,3</sup>, Zhiyu Ma<sup>1,2,3</sup>, Baba Salifu Yahaya<sup>1,2,3</sup>,  
4 Jie Xu<sup>1,2,3</sup>, Qingjun Wang<sup>1,2,3</sup>, Xuanjun Feng<sup>1,2,3</sup>, Jingwei Li<sup>2</sup>, Erliang Hu<sup>2</sup>, Yaxi Liu<sup>4</sup>, Yanli Lu<sup>1,2,3,\*</sup>

5

6 <sup>1</sup> State Key Laboratory of Crop Gene Exploration and Utilization in Southwest China, Sichuan  
7 Agricultural University. <sup>2</sup> Maize Research Institute, Sichuan Agricultural University, Wenjiang  
8 611130, Sichuan, China. <sup>3</sup> Key Laboratory of Biology and Genetic Improvement of Maize in  
9 Southwest Region, Ministry of Agriculture, China. <sup>4</sup> Triticeae Research Institute, Sichuan  
10 Agricultural University, Wenjiang, 611130, Sichuan, China.

11

12 <sup>+</sup> These authors contributed equally to this work.

13 <sup>\*</sup> Correspondence and requests for materials should be addressed to Yanli Lu (email:

14 [yanli.lu82@hotmail.com](mailto:yanli.lu82@hotmail.com))

15 **Abstract**

16 The circadian clock perceives photoperiodic changes and initiates processes leading to floral  
17 transition. *GIGANTEA* (*GI*) primarily functions as a principal clock component that integrates  
18 environmental cues into regulation of growth and development in Arabidopsis. However, it is unclear  
19 whether *ZmGIs* regulate photoperiodic flowering and abiotic stress response. Here, we demonstrated  
20 that the expression of *ZmGII* depicted a typical circadian pattern and was differentially expressed  
21 under LDs and SDs in photoperiodic sensitive and insensitive maize lines. The transcription level  
22 was significantly and positively correlated with days to silking and photoperiodic sensitivity in maize.  
23 Moreover, natural variation in *ZmGII* was associated with maize photoperiod response and the  
24 fine-tuning of plant development traits. Overexpression of *ZmGII*<sup>Huangzao4</sup> induced early flowering  
25 and enhanced salt tolerance in Arabidopsis relative to the wild-type and *gi* mutants. ZmGII formed a  
26 protein complex with ZmFKF1 and acted as a positive regulator of flowering time by regulating  
27 *CONSTANS* transcription in the photoperiod pathway. The ZmGII/ZmThox complex regulates  
28 oxidative stress induced by salt stress via a redox balance pathway. Over all, we have provided  
29 compelling evidence to suggest that *ZmGII* is a pleiotropic gene whose expression depicts a typical  
30 circadian rhythmic pattern and regulates flowering time and confers salt stress tolerance.

31 **Key words:** maize, gene pleiotropism, circadian clock, flowering time, salt stress,

32 *ZmGII*

### 33 **Introduction**

34 Plants precisely anticipate the onset of flowering by constantly monitoring environmental signals and  
35 coordinating endogenous cues to ensure a successful transition from the vegetative to reproductive  
36 growth stages. A complex network comprising various genetic and epigenetic regulators that  
37 responds to external stimuli and triggers floral transition has been well examined in the long day (LD)  
38 model species *Arabidopsis thaliana* (Blümel et al 2015). Daylength sensing (photoperiodism) is one  
39 of the most reliable seasonal cues that is exclusively measured by the circadian clock in vascular  
40 tissue (Shim et al 2017, Song et al 2015). The molecular mechanisms in the photoperiodic flowering  
41 pathway mainly involve three components: light input, circadian clock, and rhythm output (Shim et  
42 al 2017). Plants are known to perceive light signals (Day length, light quality, quantity, and direction)  
43 in mature leaves using various photoreceptors and transmit signals to the shoot apex to initiate  
44 flowering. Circadian clocks act as external time keeping mechanisms that modulate photoperiodism  
45 in plants (Creux & Harmer 2019, Millar 2004). Most components of the circadian clock are  
46 transcription repressors (Shim et al 2017) and there are multiple interconnected negative feedback  
47 loops that form a 24-h oscillator rhythm (Creux & Harmer 2019, Endo 2016, Inoue et al 2018, Locke  
48 et al 2006). The input signals from the ambient environment help reset the clock of the circadian  
49 system (Creux & Harmer 2019, Tóth et al 2001). Levels of the repressor and activator transcription  
50 factors in the circadian clocks are in constant flux, each peaking at a specific time of day and feeding  
51 back to regulate the expression of others (Creux & Harmer 2019, Shim et al 2017).

52 Circadian clocks integrate various environmental signals with endogenous cues to coordinate  
53 diverse physiological responses (Adams et al 2018, Inoue et al 2018, Qian et al 2014). In addition to  
54 its basic role in light and temperature modulation networks, the circadian clock also functions in  
55 multiple abiotic and biotic stress responses. *GI* is a unique plant specific nuclear protein involved in  
56 the circadian clock-regulated flowering pathway (Fowler et al 1999, Huq et al 2000, Mizoguchi et al  
57 2005). *GI* plays a crucial role in regulating rhythm output and further increasing *CO* mRNA  
58 abundance; it also supervises the activity and stability of the *CO* protein, which regulates the  
59 accumulation of Flowering Locus T (*FT*) transcripts in phloem companion cells in leaves (Sawa &  
60 Kay 2011, Sawa et al 2007, Suárez-López et al 2001). The floral *FT* protein then moves from  
61 companion cells in the leaf phloem to the shoot apical meristem to promote flowering. In the  
62 photoperiodic flowering pathway, *GI* and *FKF1* form a complex that degrades *DOF* factors, thus  
63 removing the inhibition of *CO* transcription, upregulating *FT* expression, and accelerating the time  
64 required to flower (Imaizumi et al 2005, Imaizumi et al 2003, Sawa et al 2007). There are two other  
65 mechanisms by which *GI* adjusts *FT* expression independent of *CO*. First, *GI* inhibits the expression

66 of *TARGET OF EAT 1 (TOE1)*, thus upregulating *FT* transcription based on miR172 regulation (Jung  
67 et al 2007). *GI* also degrades the *FT* transcriptional repressors *SHORTVEGETATIVEPHASE (SVP)*,  
68 *TEMPRANILLO 1 (TEM1)*, and *TEMPRANILLO 2 (TEM2)*, leading to high *FT* transcription  
69 (Sawa & Kay 2011). *GI* is therefore a major mediator between the circadian clock and the master  
70 regulators (*CO* and *FT*) in the photoperiodic flowering pathway.

71 Some studies have also implicated *GI* in other plant development functions, such as light signal  
72 perception (Oliverio et al 2007), cotyledon movement (Tseng et al 2004), and cell wall deposition  
73 (Edwards et al 2010). Additionally, *GI* functions as one of the crucial mediators that coordinates  
74 plant responses to various environmental stresses, such as cold (Fornara et al 2015, Fowler &  
75 Thomashow 2002), salinity (Kim et al 2016, Kim et al 2013), and drought (Riboni et al 2013, Riboni  
76 et al 2016). These results reveal that *GI* is involved in diverse biological processes of plant  
77 development and resistance to numerous stresses that threaten crop production. Information  
78 regarding the biological functions and regulatory mechanism of *ZmGIs* in the  
79 photoperiodic-dependent flowering pathway remains limited. Particularly, the function of *ZmGIs* in  
80 linking the photoperiodic pathway and stress resistance in maize is not well understood. In this study,  
81 we examined *ZmGII* expression under both LDs and short days (SDs) in different maize lines. We  
82 collected genetic, biochemical, and physiological data to investigate the role of *ZmGII* in regulating  
83 the photoperiodic flowering pathway and salt stress responses in maize. Based on the results of these  
84 analyses, we conducted further analysis on the function of *ZmGII* in promoting flowering under  
85 LDs.

## 86 **Materials and methods**

### 87 **Plant materials, growth conditions, and flowering time investigation**

88 Maize inbred line B73 was used to detect the expression patterns of *ZmGII* in different tissues under  
89 field conditions in the spring of 2019 in Wenjiang, Sichuan, China. Six extreme phenotypic maize  
90 lines were selected from two association panels comprising 87 (Liu et al 2018) and 368 diverse core  
91 maize inbred lines (Li et al 2013), from China, USA, and CIMMYT included three tropical  
92 photoperiod-sensitive inbred lines (CMT-L189, CML202, and CML496) and three  
93 temperate-neutral/photoperiod-insensitive inbred lines (Mo113, CIMBL60, and Huangzao4). For the  
94 photoperiodic assays, the plants were transferred to a controlled growth chamber at 28 °C/light and  
95 22 °C/dark for LDs (16 h light/8 h dark) or SDs (8 h light/16 h dark) and entrained for 2 weeks.

96 *ZmGII* transgenic plants were generated by Pro<sub>35S</sub>::*ZmGII*<sup>Huangzao4</sup>-*GFP* overexpressing in *Col-0*  
97 through *Agrobacterium tumefaciens*-mediated transformation. T-DNA insertion *gi* mutant (CS879752)

98 was obtained from the Arabidopsis Biological Resource Center. Plants were grown in greenhouse at  
99 22–23 °C, 60% relative humidity, and under LD (16 h light/8 h dark) or SD (8 h light/16 h dark)  
100 conditions. Flowering time was measured by counting the number of days to bolting and/or the total  
101 number of rosette leaves when floral buds were visible (nearly 1 cm long) at the center of the rosette.  
102 A total of 20–24 plants were measured and averaged for each sample. Statistical significance was  
103 determined using a Student's *t*-test (\*\* $P < 0.01$ ; \* $P < 0.05$ ).

#### 104 **Association analysis**

105 The polymorphisms among the 368 maize inbred lines were gathered from previous re-sequencing  
106 data (Li et al 2013) based on the physical location of *ZmGII* in the maize genome. All lines were  
107 grown in three environments: one with LD (>13 h, Sichuan, SC) and two with SD (<12 h, Yunnan,  
108 YN and Guangxi, GX) growth conditions. Flowering-related traits were investigated and measured  
109 as days to anthesis (DTA), days to silking (DTS), days to tasseled (DTT), and anthesis-silking  
110 interval (ASI). The other characteristics of plant architecture, such as plant height (PH), ear height  
111 (EH), ear leaf length (ELL), and ear leaf width (ELW) and kernel traits including hundred kernel  
112 weight (HKW), kernel length (KL), kernel width (KW), and kernel thickness (KT), were described  
113 previously (Li et al 2013). The traits from plant architecture and kernel for each inbred line were  
114 calculated based on the best linear unbiased prediction (BLUP) to estimate the phenotype values,  
115 which were then used to implement an association analysis. The significant SNP variations in *ZmGII*  
116 for the tested traits were calculated using TASSEL v5.0 software (Bradbury et al 2007) under a  
117 general linear model with a Q matrix indicative of population structure (GLM+Q).

#### 118 **Subcellular localization**

119 The ClonExpress<sup>®</sup> II system (Vazyme, Nanjing, China) was used to generate C-terminal enhanced  
120 green fluorescent protein (eGFP) fusion vector Pro<sub>35S</sub>::*ZmGII*<sup>Huangzao4</sup>-GFP. Transient  
121 transformations of tobacco (*Nicotiana benthamiana*) leaves were performed using an agroinfiltration  
122 protocol that has been described previously (Wu et al 2016). In addition, we also transiently  
123 expressed the plasmid by PEG mediated in maize protoplasts. The fluorescence signals were detected,  
124 and images were acquired after 40 h of incubation at room temperature using a confocal microscope  
125 (LSM800; ZEISS, Oberkochen, Germany) with appropriate filters.

#### 126 **Salt stress in Arabidopsis and maize**

127 After germination on 1/2 MS medium 4 d, WT, *gi* mutant, and *ZmGII* transformants were  
128 transplanted to 1/2 MS medium and with 100 mM NaCl, 250 mM mannitol, and 1/2 MS without  
129 phosphorus, various treatment conditions, respectively. After 12 d of cultivation, the photosynthetic

130 capacity (ratio of variable to maximum chlorophyll fluorescence,  $F_v/F_m$ ) was measured using a  
131 FluorCam 800MF system (Photon System Instruments, Drasov, Czech Republic) following the  
132 manufacturer's protocol. When seedlings of six selected maize lines reached the three-leaf stage,  
133 plants were assigned to either a new nutrient solution under normal conditions or a nutrient solution  
134 with 250 mM NaCl for 7 d. Changes in the root morphology indices of treated seedlings were  
135 measured by a WinRhizo Pro 2008a image analysis system (Regent Instruments Inc., Quebec,  
136 Canada) equipped with a professional scanner (Epson XL 1000, Nagano, Japan). H<sub>2</sub>O<sub>2</sub> accumulation  
137 in maize leaves and roots was quantified using a hydrogen peroxide assay kit (Beyotime, Shanghai,  
138 China) according to the manufacturer's instructions. Statistical significance was determined using a  
139 Student's *t*-test (\*\* $P < 0.01$ ; \* $P < 0.05$ ).

#### 140 **Measurement of promoter activity of ZmGII**

141 To investigate the response of *ZmGII* expression under salt stress, we fused the promoter of *ZmGII*  
142 to a GUS reporter gene, and the recombinant transgenes were introduced into Arabidopsis to produce  
143 Pro<sub>*ZmGII*</sub>::GUS transgenic plants. Leaves were infiltrated in GUS staining solution (50 mM sodium  
144 phosphate, pH 7.0, 10 mM EDTA, 0.1% Triton-100, 0.5 mg/ml X-gluc, 0.1 mM potassium  
145 ferricyanide, and 10% methanol) and incubated at 37 °C in the dark for 10–12 h, then washed in 70%  
146 ethanol several times until they were colorless to de-stain them before photographing. In addition,  
147 the activity of the *ZmGII* promoter was evaluated and quantified by measuring the accumulation of  
148 *GUS*. Fresh leaves were collected at ZT9 from 12 d old seedlings that had been incubated for 24 h  
149 under either SD, LD, or LD plus 100 mM NaCl conditions. The expression levels of *GUS* were  
150 measured by RT-qPCR analysis using *IPP2* as relative control. Anti-GUS (Sigma, MO, USA) was  
151 employed to determine the accumulation of GUS protein using the western blot assay.

#### 152 **Chlorophyll content estimation**

153 To estimate changes in chlorophyll content in leaves under salt stress treatment in the selected six  
154 maize inbred lines, SPAD values measured using a portable chlorophyll meter (SPAD-502,  
155 Hangzhou Mindfull Technology Co., Ltd, China) represented relative chlorophyll contents. After 3 d  
156 of salt stress treatment, SPAD values for each unfolding leaf were measured 10 times at different leaf  
157 positions, and then mean values were calculated as an indicator of chlorophyll content. At least five  
158 plants from each line were measured, and statistical analyses were conducted using the data obtained  
159 from three independent experiments. Statistical significance was assessed via a Student's *t* test ( $P \leq$   
160 0.05).

#### 161 **Proline content measurement**

162 Free proline content was determined using a ninhydrin assay (Bates et al 1973). A total of 0.2 g fresh  
163 tissue from the six maize inbred lines was ground in liquid nitrogen, then 2 mL of 3% (w/v)  
164 sulfosalicylic acid was added to each sample at room temperature with constant shaking for 10 min  
165 to extract proline. Subsequently, the supernatant was obtained after centrifugation at  $12,000 \times g$  for  
166 10 min. The supernatant was mixed with 2.5% (w/v) ninhydrin dissolved in glacial acetic acid and  
167 phosphoric acid, followed by boiling at 100 °C for 1 h. After rapid cooling and toluene extraction,  
168 the absorbance of the reaction mixture was measured at 520 nm with a microporous plate  
169 spectrophotometer (MQX200R2+Take3™, BioTek) according to the user's manual. The proline  
170 content was calculated from the standard curve obtained using the proline standard (L-proline)  
171 solution and expressed based on fresh weight as  $\mu\text{g g}^{-1}$ , with each experiment performed in triplicate.

### 172 **RNA extraction and RT-qPCR analysis**

173 Total RNA was isolated from different tissues using a Plant Total RNA Isolation Kit (Foregene,  
174 Chengdu, China) according to the manufacturer's instructions. cDNA synthesis was performed using  
175 1  $\mu\text{g}$  total RNA with a *TransScript*® II One-Step gDNA Removal and cDNA Synthesis SuperMix  
176 (TransGen, Beijing, China) with residual genomic DNA removed. The cDNA was diluted 5-fold with  
177 nuclease-free water and used as template for qRT-PCR analysis, which was performed with three  
178 technical replicates using a *TransScript*® II Green One-Step qRT-PCR SuperMix (TransGen, Beijing,  
179 China) and the expression of housekeeping genes *ZmUBI1* in maize and *IPP2* in Arabidopsis were  
180 used as internal controls. The primers used are listed in Table S1.

### 181 **Yeast two-hybrid cDNA library screening and confirmation**

182 The CloneMiner™ II cDNA library construction kit (Invitrogen) was employed to construct a cDNA  
183 library in P178 maize seedlings. High-quality cDNA libraries were constructed into pGADT7 (AD)  
184 vector and transformed into Y187 competent yeast cells by OEbiotech (Shanghai, China). Yeast  
185 two-hybrid (Y2H) library screening was performed using the Clontech two-hybrid system according  
186 to the manufacturer's instructions. The constructed carrier, Y2HGold competent yeast cells with  
187 pGBKT7-ZmGII (BD-ZmGII), was applied to screen the P178 cDNA library after it was tested for  
188 auto-activation as a bait vector. The transformants were screened on  
189 SD/-Ade/-Leu/-Trp/-His/X- $\alpha$ -Gal (Coolabar, Beijing, China) agar plates and incubated for 2–4 d at  
190 28 °C. Prey plasmids were extracted and sequenced from single blue colonies, which are putatively  
191 positive clones.

192 To further confirm interactions, candidate genes from positive clones were inserted into BD  
193 vectors and their interaction abilities were verified by co-transformation with AD-ZmGII into

194 Y2HGold strains. pGBKT7-53 and pGBKT7-Lam were co-transformed with pGADT7-T as positive  
195 and negative controls, respectively. Transformants were plated and cultured on SD/-Trp/-Leu and  
196 SD/-Ade/-Leu/-Trp/-His/X- $\alpha$ -Gal agar plates to test for interactions.

### 197 **Split luciferase (LUC) complementation**

198 The full-length coding sequences of *ZmGII* and *ZmFKF1a* were amplified by the specific primers  
199 listed in Table S1. The PCR products were cloned into nLUC/ cLUC vectors via the ClonExpress<sup>®</sup> II  
200 system (Vazyme, Nanjing, China). GV3101 harboring the corresponding constructs were  
201 resuspended in an injection infiltration buffer (10 mM MgCl<sub>2</sub>, 10 mM MES pH 5.6, and 100  $\mu$ M  
202 acetosyringone). For co-infiltration, equal volumes of two different strains carrying the indicated  
203 nLUC and cLUC constructs were mixed and infiltrated into *N. benthamiana*. After 48 h, the  
204 infiltrated leaves were sprayed with luciferin, and fluorescence was detected in the dark using a CCD  
205 camera.

### 206 **In vivo co-immunoprecipitation**

207 To further verify the interactions between *ZmGII* and *ZmFKF1a* *in vivo*, we co-infiltrated the  
208 Agrobacterium strains carrying the *ZmFKF1a*-Flag or *ZmTHOX*-mCherry and *ZmGII*-GFP  
209 plasmids into 4-week-old *N. benthamiana* leaves. For co-immunoprecipitation (Co-IP) assays, all  
210 plant tissues were ground in liquid nitrogen, proteins were extracted, and IP procedures were  
211 performed at 4 °C. Proteins were extracted in lysis buffer [50 mM Tris-HCl pH 7.5, 150 mM NaCl, 5  
212 mM EDTA, 2 mM DTT, 0.1% Triton X-100, 1 mM phenylmethyl sulfonyl fluoride (PMSF), and  
213 complete protease inhibitor cocktail tablets (Roche, Basal, Switzerland)] for 30 min. The remaining  
214 supernatant was incubated with Protein G-coupled magnetic beads (Sigma, MO, USA) that captured  
215 with anti-GFP for 4 h. The beads were then washed three times with 500  $\mu$ L of lysis buffer with  
216 protease inhibitors after adsorbing on the magnetic frame for 1 min. The bead-precipitated proteins  
217 were eluted with 2 $\times$  SDS loading buffer at 95 °C for 10 min. The *ZmGII*-GFP, *ZmFKF1a*-FLAG,  
218 and *ZmTHOX*-mCherry proteins were detected by western blot using anti-GFP (Sangon Biotech,  
219 Shanghai, China), anti-Flag (Sigma, MO, USA), and anti-mCherry (Proteintech, Wuhan, China)  
220 antibodies, respectively.

## 221 **Results**

### 222 **Natural variations in *ZmGII* significantly associated with maize photoperiod sensitivity**

223 The expression of two identified *GIGANTEA* (*ZmGII*: Zm00001d008826, *ZmGI2*:  
224 Zm00001d039589), based on CuffLinc FPKM values of inbred line B73 (12 h day/12 h night) (Lai et  
225 al 2020), showed that *ZmGII* exhibited much higher than *ZmGI2* in maize (Figure S1A), suggesting

226 that *ZmGII* plays a primary role in regulating the photoperiodic flowering pathway. In addition,  
227 *ZmGII* is extensively expressed in different tissues, especially in roots, stems, and leaves (Figure  
228 S1B). The results suggested that *ZmGII* might be involved in multiple biological processes.

229 The significant variation in phenotypes of flowering-related traits in maize is due to the latitudes  
230 of four planting environments vary considerably. Meanwhile, the agronomic traits among maize  
231 association panel were observed. Based on the physical location of *ZmGII* in the maize genome, we  
232 identified 23 polymorphic sites in coding sequence with a minor allele frequency (MAF)  $\geq 0.05$ . The  
233 association between natural variation in *ZmGII* and 12 traits (DTA, DTS, DTT, ASI, HKW, KL, KW,  
234 KT, PH, EH, ELL, and ELW) in four different environments (Table S2) was investigated, and three  
235 SNP (S7632, S7960, and S8002) located in coding regions were simultaneously significantly  
236 associated with DTA and DTS under multiple environments at  $P < 0.01$  (Figure 1A, B; Table S2),  
237 indicating that the sites have crucial roles in plant flowering. In addition, eight SNP were  
238 simultaneously significantly associated with HKW and KL (Figure 1C; Table S2). Three sites located  
239 in a complete LD block were significantly associated with PH and ELW, explaining 3.6% and 3.8%  
240 of phenotypic variation, respectively (Figure 1D; Table S2). Detailed information on the location,  
241 genotype, frequency, and statistical value of each site is presented in Table S2. The results indicate  
242 that *ZmGII* is associated with flowering time in maize development.

#### 243 **Circadian clock regulates the expression of *ZmGI1* in maize**

244 The two *ZmGIs* exhibited a 24 h rhythmic expression that peaked at ZT9 or ZT12 (Figure S1A),  
245 indicating maximum accumulation of *ZmGI* mRNAs in the early evening (Lai et al 2020). Obvious  
246 differences in *ZmGII* expression among maize inbred lines under the LD or SD conditions were  
247 revealed (Figure 2A, B). Generally, the photoperiod-sensitive tropical inbred lines exhibited  
248 significantly higher levels of *ZmGII* expression than those of the temperate lines, especially under  
249 the LD condition. Expression peaks appeared at ZT9 in tropical lines and ZT12 in temperate lines  
250 under LD conditions, indicating a distinction in regulation between the two germplasm groups.  
251 Therefore, the tropical and temperate germplasms could be well distinguished based on the  
252 expression patterns under LDs, suggesting a close relationship between the expression of *ZmGII* and  
253 photoperiodic sensitivity in maize. To further confirm this relationship, we calculated the correlation  
254 coefficient of peak expression values and photoperiodic flowering-related traits. The *ZmGII* mRNA  
255 accumulation among the lines was significantly positively correlated with DTS and photoperiodic  
256 sensitivity under both LD ( $r = 0.91$ ,  $P < 0.05$ ) (Figure 1C) and SD conditions ( $r = 0.85$ ,  $P < 0.05$ )  
257 (Figure 1D), implying that *ZmGII* might play a vital role in photoperiodic sensitivity regulation.  
258 Furthermore, the results from semi-quantitative PCR performed in the six maize inbred lines under



259 LD conditions indicated a strict diurnal cycle and expression regularity, which is consistent with  
260 these findings (Figure S1C).

261 ZmGII-GFP was simultaneously co-localized in the nucleus (RFP marker) and cytoplasm in *N.*  
262 *benthamiana* leaves (Figure S1D), even though GI is reported as a nuclei protein in Arabidopsis  
263 (Fowler et al 1999). ZmGII protein was detected in the nucleus and cytoplasm of maize protoplast  
264 cells, with GFP (Pro<sub>35S</sub>::GFP) used as a control (Figure S1E), indicating that the ZmGII was  
265 localized in the nucleus and cytoplasm.

### 266 **Overexpressing ZmGII promotes flowering under LD conditions in Arabidopsis**

267 Three independent homozygous transgenic lines (OE#8, OE#10, and OE#14) showing increased  
268 accumulation of *ZmGII* mRNA from a T<sub>4</sub> population, confirmed to contain a single Mendelian locus,  
269 were used to investigate the character of responsiveness to day length (Figure 3A, B). Under LDs,  
270 the flowering time of transgenic lines was approximately 7 d earlier than that of the WT (Figure 3B,  
271 C). Under SDs, flowering time was 3 d earlier in the transgenic plants compared to that in the WT. In  
272 comparison, flowering in the *gi* mutants was delayed by approximately 21 d compared to that in the  
273 WT under both photoperiodic conditions. Meanwhile, the number of rosette leaves in transgenic  
274 plants was almost indistinguishable from that of the WT under LD conditions (Figure 3D, E).  
275 However, the number of rosette leaves in the *gi* mutants was significantly higher than that of WT and  
276 transgenic lines. These results indicated that delayed flowering under both photoperiodic conditions  
277 in the *gi* mutants was due to a prolonged floral transition, whereas overexpression of *ZmGII*  
278 contributed to hastened floral transition.

279 Nine genes involved in the photoperiodic flowering pathway, excluding *AtCDF1* and *AtFT*, were  
280 detected at the selected sampling points. All the tested genes exhibited relatively low transcript levels  
281 in the *gi* mutants (Figure 3 and S2). The level expression of florigene *AtCO* increased significantly in  
282 the overexpressed plants under LD conditions (Figure 3F), indicating that *ZmGII* had a considerable  
283 effect on *AtCO* expression and functions upstream of *AtCO* in the LD photoperiodic flowering  
284 pathway. However, *AtTOC1* and *AtPRR7* were downregulated in overexpression plants (Figure 3G  
285 and S2), suggesting that *ZmGII* was involved in the feedback loop in the evening. This result  
286 suggests that *ZmGII* upregulates the expression of *AtCO* and promotes flowering in the  
287 photoperiodic pathway in Arabidopsis. The difference in *ZmGII* expression in the regulation of  
288 *AtFKF1* and *AtTOC1* suggested that *ZmGII* had a specific model of supervising flowering time  
289 owing to the heterogeneous overexpression or the dissimilar function of *ZmGII* in maize.

### 290 **ZmGII responds to photoperiod and salt stress**

291 *GI* is primarily involved in circadian rhythms and flowering time regulation and also regulates  
292 diverse physiological processes in Arabidopsis. To gain insight into the role that *ZmGII* function in  
293 regulating abiotic stress response, we examined the root morphological traits of the WT, *gi* mutants,  
294 and *ZmGII* transgenic lines under phosphorus starvation, drought stress, and salt stress. All the tested  
295 genotypes showed normal root elongation and equivalent lateral roots on 1/2 MS medium and  
296 manifested similar degrees of growth inhibition under phosphorus deficiency and drought stress  
297 (Figure S3A). Interestingly, *gi* mutants were highly hypersensitive to salt stress, manifesting much  
298 slower root elongation and fewer lateral roots on 1/2 MS medium supplemented with NaCl compared  
299 to the WT (Figure S3A, B).

300 To investigate whether the activity of the *ZmGII* promoter is regulated by photoperiod and salt  
301 stress, three transgenic lines in which the *ZmGII* promoter was fused with a *GUS* reporter gene were  
302 generated and detected by GUS staining and expression analysis in Arabidopsis. The GUS staining  
303 results showed that there were significant differences in expression under SDs, LDs, and LDs with  
304 salt stress (Figure 4A). Compared with the colorless control of the wild type, the transgenic lines had  
305 a deeper color under SDs than LDs, which indicated that the promoter of *ZmGII* had more powerful  
306 activity under SDs (Figure 4A-C). Moreover, salinity treatment observably enhanced the activity of  
307 the *ZmGII* promoter under LDs, even more strongly than that under SDs (Figure 4A, B). The results  
308 of the transcriptional analysis also showed that the promoter had the highest activity under salt stress  
309 transfer from SDs to LDs (Figure 4B). The observed levels of accumulated GUS protein were  
310 consistent with their transcription levels under LDs, SDs, and LDs with salt stress (Figure 4B-D).  
311 Interestingly, GUS protein accumulation was higher under SDs than under the SD plus salinity  
312 treatment (Figure 4E). Salt stress enhanced the activity of the *ZmGII* promoter and promoted GUS  
313 protein accumulation under LDs but reduced expression under SDs. Collectively, these results  
314 suggest that the activity of the *ZmGII* promoter was regulated by both photoperiod and salt stress.

### 315 **Overexpression of *ZmGII* enhances salt tolerance in Arabidopsis**

316 Intuitively, overexpression lines exhibited significantly higher salt stress tolerance compared to WT  
317 and mutant genotypes (Figure 5A-B), with marked superiority in terms of root morphological traits  
318 such as total root length, number of lateral roots, root volume, and root surface area (Figure 5D-G).  
319 These results indicate that *ZmGII* plays a crucial role in root elongation and lateral root formation  
320 under salt stress. Meanwhile, an increase in the transcriptional level of *ZmGII* was observed under  
321 NaCl treatment in the overexpression lines over time; e.g., the transcription level of *ZmGII* was 14  
322 times higher than that of 0 h after salt treatment for 9 h (Figure 5C). This result indicates that salt  
323 stress induces the accumulation of *ZmGII* mRNA or inhibits its degradation, and *ZmGII* improves

324 the tolerance of Arabidopsis to salt stress through post-transcriptional regulation.

325 The rates of seed germination and cotyledon greening in the *gi* mutants were normal on 1/2 MS  
326 medium, but, under 120 mM NaCl, their growth was retarded, and they experienced significantly  
327 higher mortality than WT (Figure 5H-K). Contrarily, under 120 mM NaCl, the transgenic lines  
328 exhibited superior growth, and *ZmGII* overexpression promoted plant survival under salt stress  
329 (Figure 5 H-K). The maximum efficiency of PSII ( $F_v/F_m$ ) was measured to assess the photosynthesis  
330 activities of *gi* mutants and transgenic plants. A decrease in the average value of  $F_v/F_m$  in WT and *gi*  
331 (Figure 5L and S3B) was detected, probably due to photodamage or downregulation of PSII reaction  
332 centers from salt stress. A consecutive salinity treatment throughout the life cycle of Arabidopsis  
333 resulted in yield reduction in the WT and higher lethality in the *gi* mutants under LDs compared to  
334 the overexpression lines (Figure 5K and S3D). A novel function of *GI/ZmGII* in controlling plant  
335 height was found, and significant variation in plant height among the different tested genotypes was  
336 observed under both control and salt stress conditions (Figure 5M and S3C-D). Under normal  
337 conditions, *GI/ZmGII* acted as an inhibitor of plant height, with the *gi* mutant becoming taller than  
338 transgenic plants, which exhibited dwarfish phenotypes. This outcome, which was opposite that  
339 under the salt stress treatment, suggested that *ZmGII* has an advantageous physiological function in  
340 maintaining yield under saline stress. The plants on the NaCl and 1/2 MS medium containing high  
341 concentrations of mannitol, which can induce osmotic stress but not ion toxicity, had  
342 indistinguishable roots among all genotypes. The results confirmed that the salt hypersensitive  
343 phenotype of the *gi* mutant was caused by ion toxicity. Hence, overexpression of *ZmGII* in  
344 Arabidopsis contributed remarkably to improved salt tolerance.

#### 345 **Photoperiodic insensitivity improves salt tolerance in maize**

346 To understand whether *ZmGII* enhances salt tolerance in maize, three inbred lines from the  
347 photoperiod-sensitive maize panel and three inbred lines from the photoperiod-insensitive maize  
348 panel were subjected to a salinity treatment. Interestingly, we observed that the  
349 photoperiod-insensitive inbred lines exhibited significantly enhanced salt tolerance (Figure 6A).  
350 Proline is one of the protective compounds that help plants acclimatize to various stresses; to  
351 determine the relationship between salt tolerance and proline content in maize leaves and roots, we  
352 examined the proline levels under both normal conditions and salinity stress conditions. Generally,  
353 the proline content in photoperiod-sensitive inbred lines was significantly higher than that in the  
354 insensitive inbred lines (Figure S4A). In addition, the proline content significantly increased in the  
355 tissues of all inbred lines after salt stress treatment. Among these, the proline level in the  
356 photoperiod-insensitive inbred line of Huangzao4 was upregulated eight-fold (Figure 6B and S4A).

357 Salt stress resulted in increased proline accumulation in the leaves and roots in the three  
358 photoperiod-insensitive maize lines with extreme salt tolerance, but it increased only in the leaves of  
359 the photoperiod-sensitive lines (Figure 6B and S4A).

360 Accumulations of H<sub>2</sub>O<sub>2</sub> in leaves and roots under two treatments were quantified by biochemical  
361 testing. There was a slight difference in the accumulation of H<sub>2</sub>O<sub>2</sub> between the photoperiod-sensitive  
362 and -insensitive lines, and there was also a much higher H<sub>2</sub>O<sub>2</sub> content in the leaves than in the roots;  
363 however, salt stress decreased total H<sub>2</sub>O<sub>2</sub> content (Figure S4B). Under the salt stress treatment, the  
364 H<sub>2</sub>O<sub>2</sub> contents of leaves and roots in the three sensitive lines were slightly decreased (Figure 6C and  
365 S4B). Interestingly, there was a greater difference in the reduction of leaf H<sub>2</sub>O<sub>2</sub> content in insensitive  
366 lines than in sensitive lines after salinity treatment (Figure 6C). In particular, it should be noted that  
367 the H<sub>2</sub>O<sub>2</sub> content in the roots of insensitive lines increased under salt stress, the ratios of H<sub>2</sub>O<sub>2</sub>  
368 content in roots between the salinity treatment and control treatment were much higher than in the  
369 sensitive lines (Figure 6C and S4B). The results indicate that although H<sub>2</sub>O<sub>2</sub> was mainly concentrated  
370 in the leaves, the increase in root H<sub>2</sub>O<sub>2</sub> content under salt stress treatment facilitated salt tolerance in  
371 the maize inbred lines.

372 In the three extremely salt-tolerant, photoperiod-insensitive inbred lines, the salinity treatment:  
373 control treatment response ratios for root length, surface area, root volume, and total root tips were  
374 notably increased compared to those of the photoperiod-sensitive lines (Figure 6D). We further  
375 compared the SPAD values of salt-tolerant and salt-sensitive plants under both control and stress  
376 conditions. There were no obvious differences among the three tested unfolding leaves under normal  
377 conditions (Figure 6E). However, a significant difference in the SPAD values was identified between  
378 the sensitive and insensitive genotypes under salt-stress treatment (Figure 6F), and this indicates that  
379 chlorophyll concentration could be a key factor for evaluating salt tolerance in maize. Moreover, the  
380 third leaf showed a huge reduction in chlorophyll concentration (Figure 6E-G), indicating that the  
381 chlorophyll in the old leaves degraded earlier than that in the younger ones.

### 382 **ZmGII interacts with ZmFKF1a and ZmTHOX**

383 To elucidate the molecular mechanisms underlying the function of *ZmGII* proteins in flowering time  
384 regulation and other biological functions, we performed a yeast two-hybrid assay using ZmGII as  
385 bait to identify the potential interacting proteins. The transcriptional activation activity of ZmGII in  
386 Y2H Glod was detected with full-length and truncated fragment constructs (amino acids 1 to 358,  
387 359 to 612, 613 to 804, and 805 to 1163) (Figure S5). The truncated fragment of the ZmGII protein  
388 with no transcriptional activation activity (amino acids 359 to 1163) was used as bait to screen the  
389 yeast prey cDNA library prepared from whole P178 maize plants. The complete open reading frame

390 of three candidate genes, detected in more than four independent clones, were revealed to interact  
391 with ZmGII<sup>359-1163</sup>. None of the three proteins showed transcriptional activation activity (Figure 7A).  
392 Subsequently, Y2H assay demonstrated ZmFKF1a (Zm00001d007445), ZmSKIP35  
393 (Zm00001d016858), and ZmTHOX (Zm00001d018461) interacted with ZmGII (Figure 7B). The  
394 interaction between FKF1 and GI is known to regulate flowering time in Arabidopsis (Imaizumi et al  
395 2005), hence ZmFKF1a and ZmGII might perform similar functions in maize. *SKIP* genes are  
396 known for their function in alternative splicing of transcripts (Cui et al 2017, Wang et al 2012),  
397 suggesting that *ZmGII*'s many alternative splicing activities could have resulted from its physical  
398 interaction with ZmSKIP35. Most biotic and abiotic stresses in plants are associated with redox  
399 reactions (Lázaro et al 2013). Thus, we assumed that the overexpression of *ZmGII* regulates the Trx  
400 system by recruiting the ZmTHOX protein to improve stress tolerance.

401 Split luciferase (split-LUC) complementation assay was used to confirm whether ZmFKF1a  
402 interacts with ZmGII in the abaxial epidermal cells of tobacco leaves. Our results demonstrated that  
403 ZmFKF1a and ZmGII physically interact *in vivo* (Figure 7C). Coimmunoprecipitation (Co-IP)  
404 assays using *N. benthamiana* leaves further confirmed the interactions between ZmFKF1 and ZmGII  
405 (Figure 7D), suggesting that ZmFKF1a and ZmGII do exist in a complex. A further Co-IP assay by  
406 co-expressing ZmGII and ZmTHOX proteins in *N. benthamiana* leaves also confirmed the  
407 interaction between these two proteins (Figure 7F). In addition, ZmGII and ZmTHOX were fused  
408 with green fluorescence (ZmGII-eGFP) and mCherry (ZmTHOX-mCherry), respectively. The  
409 co-expression results showed that both proteins were localized in the nuclei and cytoplasm in *N.*  
410 *benthamiana* leaves (Figure 7E). The consistent localization of these two proteins makes their  
411 physical interaction more credible.

## 412 Discussion

413 **The circadian clock was visibly different in photoperiod-sensitive and -insensitive maize lines**  
414 *GI* is specific to terrestrial plants whose expression is regulated by the circadian clock, and it  
415 functions as a regulator of biological rhythms and flowering in plants (Imaizumi et al 2005, Park et al  
416 2013). The circadian clock system is regulated in an orderly and precise manner by multiple  
417 interconnected transcriptional and translational feedback loops. The *GI* repressors *CCA1* and *LHY*  
418 are inhibited during the day by *TOC1*, which is in turn degraded at night by the F-box protein  
419 *ZEITLUPE* (*ZTL*), releasing *CCA1* and *LHY* to inhibit *GI* expression (Cha et al 2017, David et al  
420 2006, Más et al 2003), and thus resulting in the *GI* rhythmic expression pattern. The FPKM and  
421 qPCR analyses showed that *ZmGII* expression follows a typical circadian rhythmic pattern, reaching

422 peak expression in the evening near the onset of darkness and a lowered expression at dawn. This  
423 indicates that the regulation of *ZmGII* expression depends highly on photoperiod. *ZmGII* mRNA  
424 accumulates in a similar fashion to that of *TOC1* and *CO*, which enhance flowering under prolonged  
425 photoperiodic conditions (Doyle et al 2002, Más et al 2003). We believe that the circadian rhythmic  
426 expression of *ZmGII* probably resulted from the accumulation and inhibition of the ZmGII protein  
427 during the day and night, respectively.

428 *GI* genes are known to function in the photoperiodic pathway as part of a timekeeping mechanism  
429 that regulates the perception of photoperiodic cues by photoperiod-sensitive plants (Mizoguchi et al  
430 2005, Samach & Coupland 2000). The results of the expression analysis showed marked variation in  
431 the rhythmic expression of *ZmGII* under LD conditions in the different maize inbred lines. The  
432 tropical sensitive lines exhibited higher *ZmGII* expression and reached peak expression 3 h earlier  
433 than the temperate insensitive inbred lines. Moreover, the expression of *ZmGII* among the lines was  
434 significantly and positively correlated with DTS under LD conditions ( $r = 0.91$ ,  $P < 0.05$ ) (Figure  
435 2C); this implies that *ZmGII* plays a central role in regulating the sensitivity of tropical maize lines  
436 to LD photoperiodism compared with the insensitive lines, and thus its regulatory role differs  
437 between the tested tropical and temperate lines.

#### 438 **ZmGII plays a crucial role in regulating flowering time**

439 The results of this study revealed that *ZmGII* exhibits typical circadian characteristics and regulates  
440 flowering under LD conditions. SNP variations of *ZmGII* exhibited significant associations with  
441 flowering-related traits in maize, while overexpression in *Arabidopsis* significantly promoted  
442 flowering under LD conditions compared to the WT and *gi* mutants. The complex of ZmGII1 and  
443 ZmFKF1a can regulate the degradation of CO and FT repressors under LD conditions in *Arabidopsis*.  
444 Mizoguchi (Mizoguchi et al 2005) reported late flowering and a reduction in *CO* mRNA  
445 accumulation in *gi* mutants, and suggested that *GI* might function in the flowering pathway in  
446 *Arabidopsis* by regulating a surge in the abundance of mRNAs of *CO* and *FT* under LD conditions.  
447 Accumulation of CO and promotion of flowering in overexpressing *ZmGII* (Figure 3) was in tandem  
448 with the findings of Imaizumi *et al.* (Imaizumi et al 2005) and Suarez-Lopez (Suárez-López et al  
449 2001). Since CO and FT proteins are highly conserved among photoperiod-sensitive plants (Ballerini  
450 & Kramer 2011), *ZmGII* is believed to act upstream and activates the transcription of *CO* and *FT*,  
451 which function as central integrators for regulating flowering time in photoperiod-sensitive plants. At  
452 the posttranscriptional stage, the stability of CO at the end of the light period under LD conditions is  
453 modulated by the circadian clock through the regulation of *GI* and *FKF1* expression (Park et al 2016,  
454 Song et al 2015). In addition, comparisons of the bolting time and rosette leaves among the

455 genotypes showed a significant delay in flowering time and higher number of rosette leaves in the *gi*  
456 mutants compared to the overexpression lines and WT, confirming the role of *ZmGII* in the  
457 flowering pathway in plants.

458 However, the flowering regulatory function of *ZmGII* was widely divergent in Arabidopsis and in  
459 diverse maize germplasms. The role of *ZmGII* in regulating circadian rhythms, revealed in the  
460 expression analysis, might have contributed to its function in the photoperiodic regulation of maize  
461 flowering time. This is consistent with the findings made by Li *et al.* (Li et al 2016) and Salomé *et al.*  
462 (Salomé et al 2008). The expression and correlation analyses also demonstrated that *ZmGII* is  
463 functionally distinct in various maize inbred lines under LD and SD photoperiodic conditions. The  
464 abundance of *ZmGII* transcripts was positively correlated with days to flowering time in the three  
465 tropical lines under LDs, and the *ZmGII* expression level was positively correlated with DTS,  
466 suggesting an inhibiting effect of *ZmGII* on regulating flowering time under LD conditions.

#### 467 **Dual functions of *ZmGII* in flowering time regulation and salt stress response**

468 *ZmGII* expression was revealed in roots, stems, leaves, floral organs, and fruit spikes, and we found  
469 that it could regulate other biological functions besides the circadian clock and plant flowering  
470 pathways. *GI* has been implicated in pleiotropic functions, including perception and adaptation to  
471 environmental stress conditions (Kim et al 2013, Mishra & Panigrahi 2015, Riboni et al 2013).  
472 Differences in the function of different mutants generated from mutations at different segments of *GI*  
473 indicate that different segments of *GI* might have distinct or opposing regulatory roles in plants. A  
474 similar deduction was made by Kim *et al.* (Kim et al 2016), who used RNAi technology to  
475 selectively degrade different segments of *BrGI* and generated different mutants with opposing  
476 responses to salt stress.

477 In this study, we have demonstrated that *ZmGII* has multiple functions in maize and that there  
478 were linkages between the regulation of the photoperiodic flowering pathway and salt stress response  
479 (Figure 4). In the salt response, an anticipated accumulation of proline, which helps to enhance stress  
480 tolerance in plants, was detected in both roots and leaves (Figure S4A). H<sub>2</sub>O<sub>2</sub>, produced by cellular  
481 aerobic metabolism, seems to be tightly regulated as H<sub>2</sub>O<sub>2</sub> levels increase only slightly in response to  
482 stress (Rani et al 2015). By contrast, H<sub>2</sub>O<sub>2</sub> has been found to act as a signaling molecule and  
483 secondary messenger to regulate various stress resistance processes in plant (Rani et al 2015,  
484 Sewelam et al 2014). Thus, the balance of H<sub>2</sub>O<sub>2</sub> in cells maintained by the antioxidant enzymes was  
485 an important indicator in salt stress response. In this study, NaCl promoted the accumulation of H<sub>2</sub>O<sub>2</sub>  
486 in roots. Low levels of H<sub>2</sub>O<sub>2</sub> act as a signal to activate the expression of ZmThox, a member of the  
487 thioredoxin peroxidases, which then eliminates the H<sub>2</sub>O<sub>2</sub> in leaves to reduce damage to leaves from

488 oxygen free radicals (Figure 8). In addition, ZmThox also belongs to the PPPDE family, a kind of  
489 deubiquitinating enzyme, and inhibits the degradation of ZmGII under salt stress.

490 We concluded that overexpression of *ZmGII* confers salt stress tolerance in Arabidopsis, which is  
491 contrary to the findings of Kazan and Lyons (Kazan & Lyons 2016), who reported that *AtGI*  
492 negatively regulates salt tolerance by repressing the phosphorylation of SOS1 in the SOS pathway.  
493 The ZmGII/ZmThox complex might confer salt stress tolerance by protecting the mitochondria from  
494 oxidative stress through a post-transcriptional adjustment in *S*-glutathionylation and *S*-nitrosylation.  
495 The role of the *Trx* gene family in oxidative stress tolerance was elaborated by Lázaro *et al.* (Lázaro  
496 *et al* 2013). Generally, we found that ZmGII had significant roles in the photoperiodic flowering  
497 pathway and salt stress in maize. However, the molecular mechanisms underlying the function of  
498 ZmGII are likely to be widely divergent from GI functions in Arabidopsis. Studies exploring  
499 whether ZmGII has even more functional roles should be conducted, and the molecular mechanisms  
500 of ZmGII function in different cellular processes should be further investigated.

#### 501 **Supplementary data**

502 **Figure S1** The expression characteristics of *ZmGII*.

503 **Figure S2** Expression pattern of flowering relative genes in WT, gi and overexpression plants under  
504 LDs.

505 **Figure S3** Pro35S::ZmGII affect plant growth responses to salt stress in Arabidopsis thaliana.

506 **Figure S4** Determination of proline and H<sub>2</sub>O<sub>2</sub> content under salt stress in maize seedlings.

507 **Figure S5** Transcriptional activity assay of ZmGII.

508 **Table S1** Primers used in this study.

509 **Table S2** Associations between the natural variations within ZmGII and agronomic traits.

#### 510 **Acknowledgment**

511 We are grateful to Prof. Cuijun Zhang (Shenzhen Agricultural Genome Research Institute, Chinese  
512 Academy of Agricultural Sciences) and Prof. Chunzhao Zhao (Institute of Plant Physiology and  
513 Ecology, Chinese Academy of Sciences) for technical assistance. This work was supported by grants  
514 from the National Key Research and Development Program of China (2016YFD0101803); and the  
515 National Natural Science Foundation of China (32030078 and 31901557).

#### 516 **Author Contributions**

517 Y.L., F.W. and L.L. conceived of the research, and participated in its design and coordination; F.W.,  
518 L.L., and Y.K. performed the experiments and drafted the manuscript; J.L., Z.M., Y.K., B.S.Y., and



519 E.H. performed data collection, analysis, or interpretation; J.X., Q.W., X.F. and Y.L. revised the  
520 manuscript. F.W., L.L., and J.L. contributed equally. All the authors read and approved of the final  
521 version of the manuscript.

## 522 **References**

- 523 Adams S, Grundy J, Veflingstad S, Dyer N, Hannah M, et al. 2018. Circadian control of abscisic acid  
524 biosynthesis and signalling pathways revealed by genome-wide analysis of LHY binding targets. *New*  
525 *Phytologist* 220: 893–907
- 526 Ballerini E, Kramer E. 2011. In the Light of Evolution: A Reevaluation of Conservation in the CO-FT Regulon  
527 and Its Role in Photoperiodic Regulation of Flowering Time. *Front Plant Sci* 16: 81
- 528 Bates L, Waldren R, Teare I. 1973. Rapid determination of free proline for water-stress studies. *Plant Soil* 39:  
529 205-07
- 530 Blümel M, Dally N, Jung C. 2015. Flowering time regulation in crops — what did we learn from Arabidopsis ?  
531 *Current Opinion in Biotechnology* 32: 121–29
- 532 Bradbury P, Zhang Z, Kroon D, et al. 2007. TASSEL: software for association mapping of complex traits in  
533 diverse samples. *Bioinformatics* 23: 2633-35
- 534 Cha J, Kim J, Kim T, Zeng Q, Wang L, et al. 2017. GIGANTEA is a co-chaperone which facilitates maturation  
535 of ZEITLUPE in the Arabidopsis circadian clock. *NATURE COMMUNICATIONS* 8: DOI:  
536 10.1038/s41467-016-0014-9
- 537 Creux N, Harmer S. 2019. Circadian Rhythms in Plants. *Cold Spring Harb Perspect Biol*. doi:  
538 10.1101/cshperspect.a034611
- 539 Cui Z, Tong A, Huo Y, Yan Z, Yang W, et al. 2017. SKIP controls flowering time via the alternative splicing of  
540 SEF pre-mRNA in Arabidopsis. *BMC Biology* 15: doi:10.1186/s12915-017-0422-2
- 541 David K, Armbruster U, Tama N, Putterill J. 2006. Arabidopsis GIGANTEA protein is post-transcriptionally  
542 regulated by light and dark. *FEBS Letters* 580: 1193–97
- 543 Doyle M, Davis S, Bastow R, McWatters H, Kozma-Bognár L, et al. 2002. The ELF4 Gene Controls Circadian  
544 Rhythms and Flowering Time in Arabidopsis Thaliana. *Nature* 419: 74-77
- 545 Edwards J, Martin A, Andriunas F, Offler C, Patrick J, McCurdy D. 2010. GIGANTEA is a component of a  
546 regulatory pathway determining wall ingrowth deposition in phloem parenchyma transfer cells of  
547 Arabidopsis thaliana. *Plant J*. 63: 651–61
- 548 Endo M. 2016. Tissue-specific circadian clocks in plants. *Curr Opin Plant Biol* 29: 44–49
- 549 Fornara F, Montaigu A, Sánchez-Villarreal A, Takahashi Y, Themaat E, et al. 2015. The GI–CDF module of  
550 Arabidopsis affects freezing tolerance and growth as well as flowering. *The Plant Journal* 81: 695–706
- 551 Fowler S, Lee K, Onouchi H, Samach A, Richardson K, et al. 1999. GIGANTEA: a circadian clock-controlled  
552 gene that regulates photoperiodic flowering in Arabidopsis and encodes a protein with several possible  
553 membrane-spanning domains. *EMBO Journal* 18: 4679–88
- 554 Fowler S, Thomashow M. 2002. Arabidopsis transcriptome profiling indicates that multiple regulatory pathways  
555 are activated during cold acclimation in addition to the CBF Cold Response Pathway. *The Plant Cell* 14:

- 556 1675–90
- 557 Huq E, Tepperman J, Quail P. 2000. GIGANTEA is a nuclear protein involved in phytochrome signaling in  
558 Arabidopsis. *Proc. Natl. Acad. Sci. USA* 97: 9789–94
- 559 Imaizumi T, Schultz T, Harmon F, Ho L, Kay S. 2005. FKF1 F-box protein mediates cyclic degradation of a  
560 repressor of CONSTANS in Arabidopsis. *Science* 309: 293–97
- 561 Imaizumi T, Tran H, Swartz T, Briggs W, Kay S. 2003. FKF1 is essential for photoperiodic-specific light  
562 signalling in Arabidopsis. *Nature* 426: 302–06
- 563 Inoue K, Araki T, Endo M. 2018. Circadian clock during plant development. *Journal of Plant Research* 131:  
564 59–66
- 565 Jung J, Seo Y, Seo P, Reyes J, Yun J, et al. 2007. The GIGANTEA-regulated microRNA172 mediates  
566 photoperiodic flowering independent of CONSTANS in Arabidopsis. *The Plant Cell* 19: 2736–48
- 567 Kazan K, Lyons R. 2016. The link between flowering time and stress tolerance. *Journal of Experimental Botany*  
568 67: 47–60
- 569 Kim J, Jung H, Hong J, Hermand V, McClung C, et al. 2016. Reduction of GIGANTEA expression in transgenic  
570 Brassica rapa enhances salt tolerance. *Plant Cell Rep* 35: 1943–54
- 571 Kim W, Ali Z, Park H, Park S, Cha J, et al. 2013. Release of SOS2 kinase from sequestration with GIGANTEA  
572 determines salt tolerance in Arabidopsis. *Nat. Commun.* 4
- 573 Lázaro J, Jiménez A, Camejo D, Iglesias-Baena I, Martí M, et al. 2013. Dissecting the integrative antioxidant  
574 and redox systems in plant mitochondria. Effect of stress and S-nitrosylation. *Front Plant Sci* 28: 460
- 575 Lai X, Bendix C, Yan L, Zhang Y, Schnable J, Hamon F. 2020. Interspecific analysis of diurnal gene regulation  
576 in panicoid grasses identifies known and novel regulatory motifs. *BMC Genomics* 21
- 577 Li H, Peng Z, Yang X, Wang W, Fu J, et al. 2013. Genome-wide association study dissects the genetic  
578 architecture of oil biosynthesis in maize kernels. *Nat. Genet.* 45: 43–50
- 579 Li S, Yue W, Wang M, Qiu W, Zhou L, Shou H. 2016. Mutation of OsGIGANTEA Leads to Enhanced Tolerance  
580 to Polyethylene Glycol-Generated Osmotic Stress in Rice. *Front Plant Sci* 7: 465
- 581 Liu L, Wu Y, Liao Z, Xiong J, Wu F, et al. 2018. Evolutionary Conservation and Functional Divergence of the  
582 LFK Gene Family Play Important Roles in the Photoperiodic Flowering Pathway of Land Plants. *Heredity*  
583 120: 310–28
- 584 Locke J, Kozma-Bognár L, Gould P, Fehér B, Kevei E, et al. 2006. Experimental validation of a predicted  
585 feedback loop in the multi-oscillator clock of Arabidopsis thaliana. *Mol. Syst. Biol.* 2: 1–6
- 586 Más P, Kim W, Somers D, Kay S. 2003. Targeted degradation of TOC1 by ZTL modulates circadian function in  
587 Arabidopsis thaliana. *Nature* 426: 567–70
- 588 Millar A. 2004. Input signals to the plant circadian clock. *Journal of Experimental Botany* 55: 277–83
- 589 Mishra P, Panigrahi K. 2015. GIGANTEA – an emerging story. *Frontiers in plant science* 6
- 590 Mizoguchi T, Wright L, Fujiwara S, Cremer F, Lee K, et al. 2005. Distinct Roles of GIGANTEA in Promoting  
591 Flowering and Regulating Circadian Rhythms in Arabidopsis. *The Plant Cell* 17: 2255–70
- 592 Oliverio K, Crepy M, Martin-Tryon E, Milich R, Harmer S, et al. 2007. GIGANTEA regulates phytochrome  
593 A-mediated photomorphogenesis independently of its role in the circadian clock. *Plant Physiol.* 144:  
594 495–502

- 595 Park H, Kim W, Yun D. 2013. A role for GIGANTEA: keeping the balance between flowering and salinity stress  
596 tolerance. *Plant Signaling & Behavior* 8: e24820
- 597 Park M, Kwon Y, Gil K, Park C. 2016. LATE ELONGATED HYPOCOTYL regulates photoperiodic flowering via  
598 the circadian clock in Arabidopsis. *BMC Plant Biology* 16: 114
- 599 Qian H, Han X, Peng X, et al. 2014. The circadian clock gene regulatory module enantioselectively mediates  
600 imazethapyr-induced early flowering in Arabidopsis thaliana. *J. Plant Physiol.* 171: 92–98
- 601 Rani V, Mishra S, Yadav T, Yadav U, Kohli S. 2015. Hydrogen Peroxide Sensing and Signaling. In: Free  
602 Radicals in Human Health and Disease. © Springer India 2015
- 603 Riboni M, Galbiati M, Tonelli C, Conti L. 2013. GIGANTEA Enables Drought Escape Response via Abscisic  
604 Acid-Dependent Activation of the Florigens and SUPPRESSOR OF OVEREXPRESSION OF  
605 CONSTANS1. *Plant Physiology* 162: 1706–19
- 606 Riboni M, Test A, Galbiati M, Tonelli C, Conti L. 2016. ABA-dependent control of GIGANTEA signalling enables  
607 drought escape via up-regulation of FLOWERING LOCUS T in Arabidopsis thaliana. *Journal of*  
608 *Experimental Botany* 67: 6309–22
- 609 Salomé P, Xie Q, McClung C. 2008. Circadian Timekeeping during Early Arabidopsis Development. *Plant*  
610 *Physiol* 147: 1110–25
- 611 Samach A, Coupland G. 2000. Time measurement and the control of flowering in plants. *BioEssays* 22: 38–47
- 612 Sawa M, Kay S. 2011. GIGANTEA directly activates flowering locus T in Arabidopsis thaliana. *Proc. Natl. Acad.*  
613 *Sci. USA.* 108: 11698–703
- 614 Sawa M, Nusinow D, Kay S, Imaizumi T. 2007. FKF1 and GIGANTEA complex formation is required for  
615 day-length measurement in Arabidopsis. *Science* 318: 261–65
- 616 Sewelam N, Jaspert N, Kelen V, Tognetti V, Schmitz J, et al. 2014. Spatial H<sub>2</sub>O<sub>2</sub> Signaling Specificity: H<sub>2</sub>O<sub>2</sub>  
617 from Chloroplasts and Peroxisomes Modulates the Plant Transcriptome Differentially. *Molecular Plant* 00:  
618 1-21
- 619 Shim J, Kubota A, Imaizumi T. 2017. Circadian Clock and Photoperiodic Flowering in Arabidopsis:  
620 CONSTANS Is a Hub for Signal Integration. *Plant Physiology* 173: 5–15
- 621 Song Y, Shim J, Kinmonth-Schultz H, Imaizumi T. 2015. Photoperiodic flowering: time measurement  
622 mechanisms in leaves. *Annu Rev Plant Biol* 66: 441–64
- 623 Suárez-López P, Wheatley K, Robson F, Onouchi H, Valverde F, Coupland G. 2001. CONSTANS mediates  
624 between the circadian clock and the control of flowering in Arabidopsis. *Nature* 410: 1116–20
- 625 Tóth R, Kevei E, Hall A, Millar A, Nagy F, Kozma-Bognár L. 2001. Circadian Clock-Regulated Expression of  
626 Phytochrome and Cryptochrome Genes in Arabidopsis. *Plant Physiology* 127: 1607-16
- 627 Tseng T, Salomé P, McClung C, Olszewski N. 2004. SPINDLY and GIGANTEA interact and act in Arabidopsis  
628 thaliana pathways involved in light responses, flowering, and rhythms in cotyledon movements. *The Plant*  
629 *Cell* 16: 1550–63
- 630 Wang X, Wu F, Xie Q, Wang H, Wang Y, et al. 2012. SKIP Is a Component of the Spliceosome Linking  
631 Alternative Splicing and the Circadian Clock in Arabidopsis. *The Plant Cell* 24: 3278-95
- 632 Wu F, Liu Z, Xu J, Gao S, Lin H, et al. 2016. Molecular Evolution and Association of Natural Variation in  
633 ZmARF31 with Low Phosphorus Tolerance in Maize. *Frontiers in plant science* 7
- 634

635 **Figures and Figure legends**

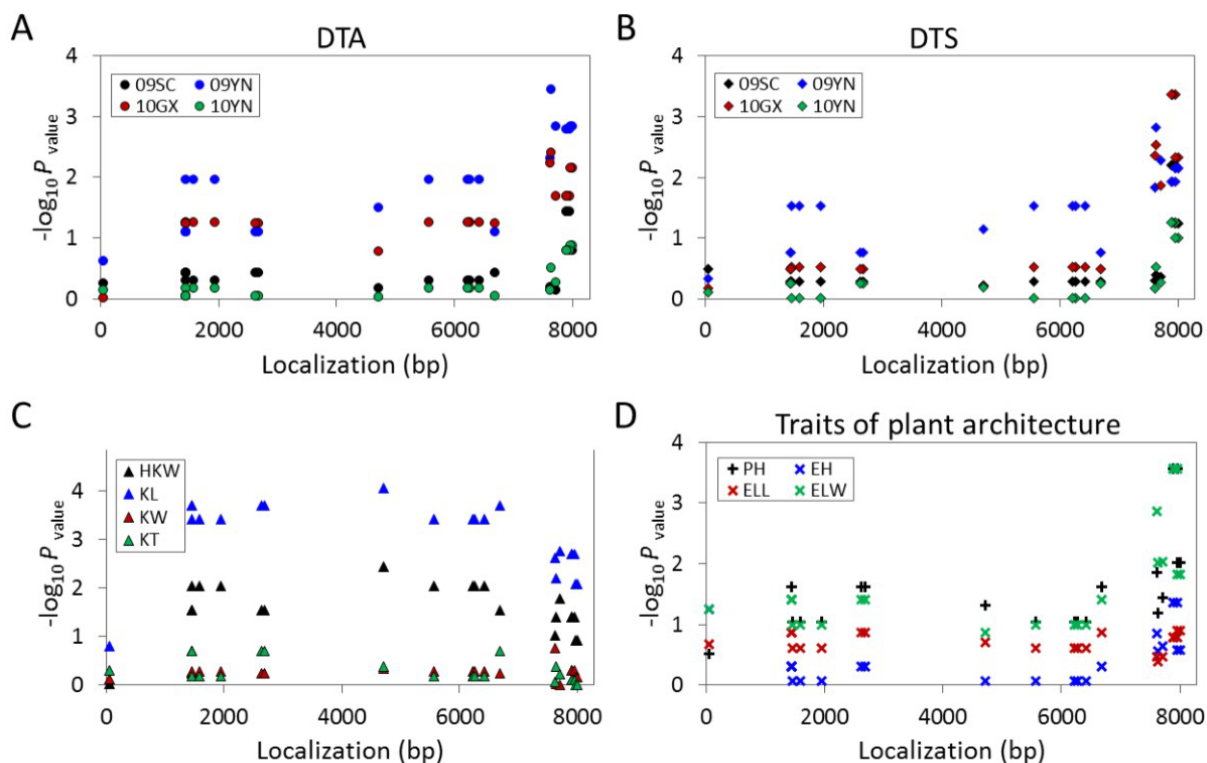

636

637 **Figure 1** Natural variations within *ZmGII* are associated with agronomic traits. (A, B) Natural  
 638 variation in *ZmGII* associated with day to anthesis (DTA) and day to silk (DTS) under various  
 639 photoperiod conditions, respectively. Each circle and rhombus represent a polymorphic SNP. 09SC,  
 640 09YN, 10GX, 10YN indicate 2009 in Sichuan, 2009 in Yunnan, 2010 in Guangxi and 2010 in  
 641 Yunnan, respectively. (C, D) Natural variation in *ZmGII* associated with traits of kernel and plant  
 642 architecture, respectively. All the tested traits were performed under four photoperiod conditions and  
 643 the BLUP values of traits were calculated to assess the association between *ZmGII* and agronomic  
 644 traits, like hundred kernel weight (HKW), kernel length (KL), kernel width (KW), kernel thickness  
 645 (KT), plant height (PH), ear height (EH), ear leaf length (ELL), and ear leaf width (ELW). Each  
 646 triangle and cross represent a polymorphic SNP.

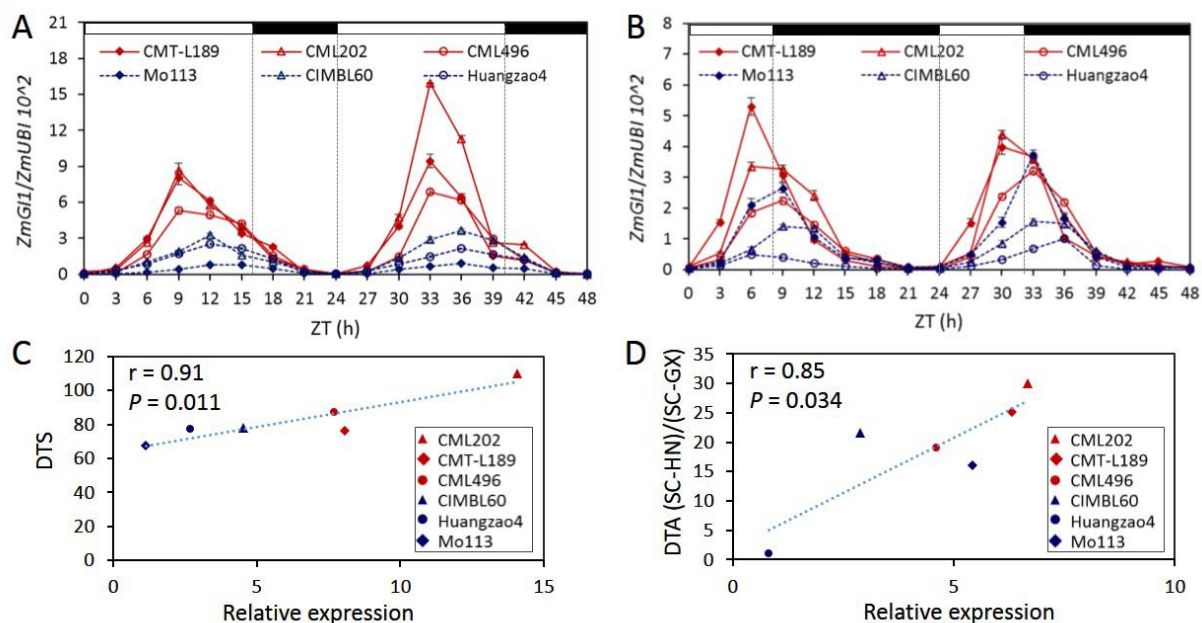

647

648 **Figure 2** Expression characteristics of *ZmGII* in maize. Diurnal expression of *ZmGII* in maize under  
 649 LDs (A) and SDs (B) conditions. Samples were harvested every three hours during a 48-h period.  
 650 Red and blue lines indicate photoperiodic sensitive and insensitive maize lines, respectively. (C) The  
 651 correlation between the expression of *ZmGII* in six maize inbred lines and the Day to Silk (DTS)  
 652 trait under long-day condition in Sichuan at 2009 (Day length >13.5 h). (D) The correlation between  
 653 the expression of *ZmGII* and the photoperiod sensitivity index calculated from Day to Anthesis  
 654 (DTA) in the long-day condition of Sichuan at 2009 (Day length >13.5 h) and the short-day of  
 655 Hainan at 2009 (Day length <12 h) and Guangxi at 2010 (Day length <11.5 h).

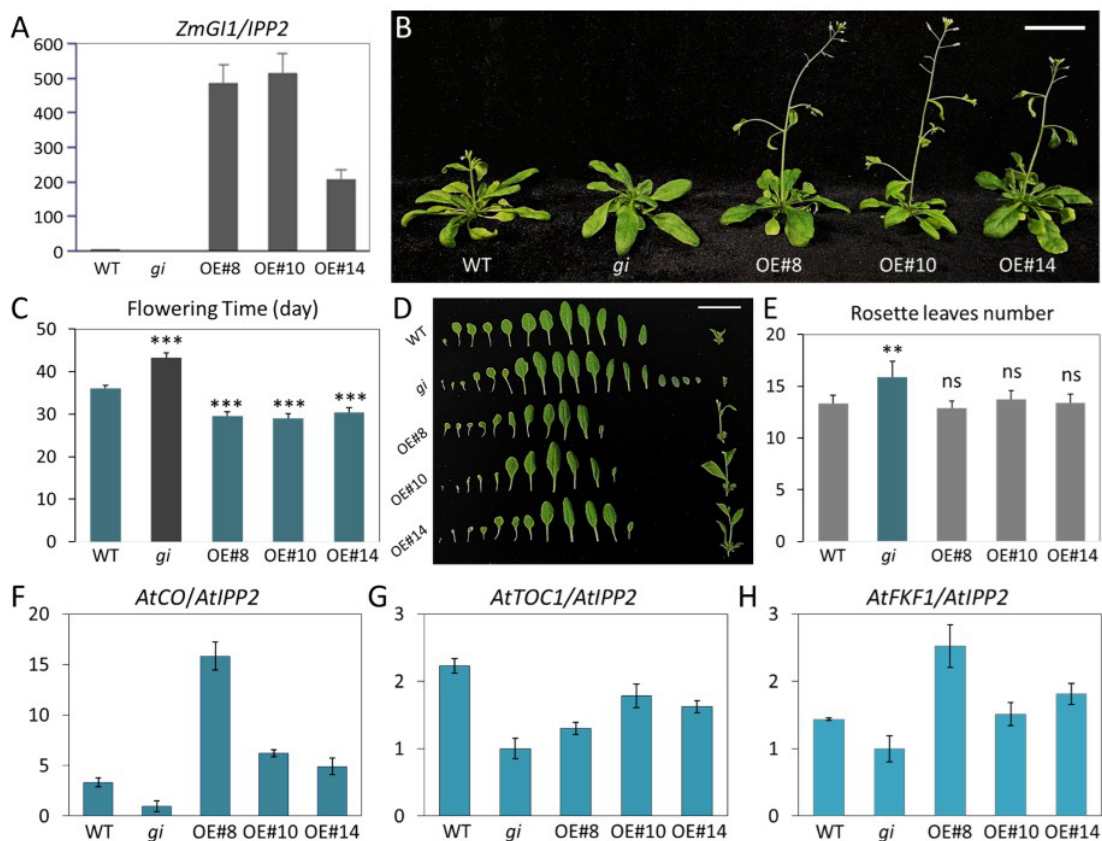

656

657 **Figure 3** Phenotypes of overexpression *ZmGII* in Arabidopsis under LDs. (A) The transcription of  
658 *ZmGII* was detected in 36-d-old seedlings of different overexpression lines at ZT10. (B)  
659 Phenotypes of different genotypic plants after 36 d treatment under LDs grown in soil. (C) Bolting  
660 time assay in different genotypes under LDs. Values are means  $\pm$  SD ( $24 \geq n \geq 20$ );  $**P < 0.01$   
661 (Student's *t* test). (D) Morphological phenotype of the leaves of 30-d-old WT, *gi* and *ZmGII*  
662 overexpression plants grown in soil under LDs. (E) Number of rosette leaves calculated from d;  
663 (F-H) Expression Patterns of *AtCO* (f), *AtTOC1* (g), and *AtFKF1*(h) in wild-type, *gi*, and  
664 overexpression plants under LDs. The expression levels measured by RT-qPCR are shown relative to  
665 the housekeeping gene *IPP2*. Each plant sample rosette leaves were harvested in 35 d after  
666 germination at ZT10, a relatively high expression point of *ZmGII*.  $***, P < 0.001$ ; ns, not significant  
667 (Student's *t* test). The scales are 3 cm in (A) and (D).

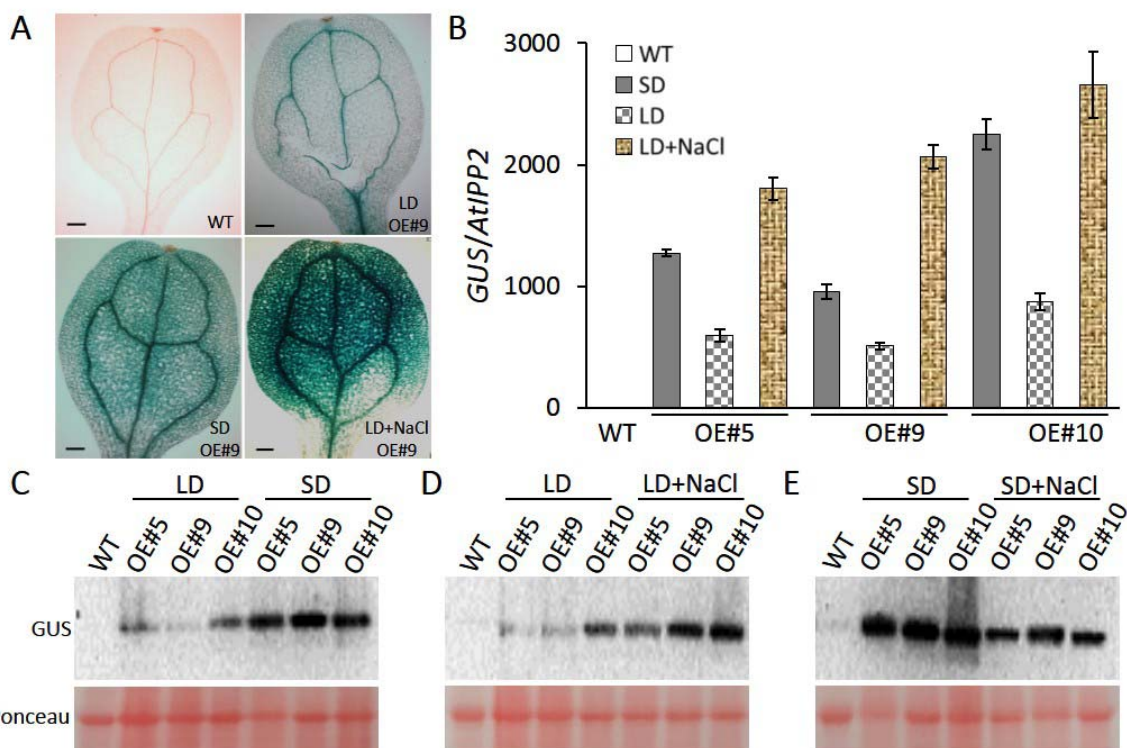

668

669 **Figure 4** Expression analysis of transcription and protein level in *ProZmG11::GUS* transgenic lines in  
 670 Arabidopsis. **(A)** GUS expression of mature leaves were stained in transgenic seedlings. The 7-d-old  
 671 transgenic lines were cultured on 1/2MS in SD, and then transferred to LD and with salt stress  
 672 medium for 24 h. Scales are 200  $\mu$ m. **(B)** The relative transcriptional levels of *GUS* were detected in  
 673 different genotypes of Arabidopsis from (A). **(C-E)** Comparative determination of protein levels in  
 674 LDs and SDs (C) , LDs and salt stress (D), SDs and salt stress (E) used with anti-GUS in different  
 675 genotypes of Arabidopsis. Similar results were obtained in three independent biological repetitions.

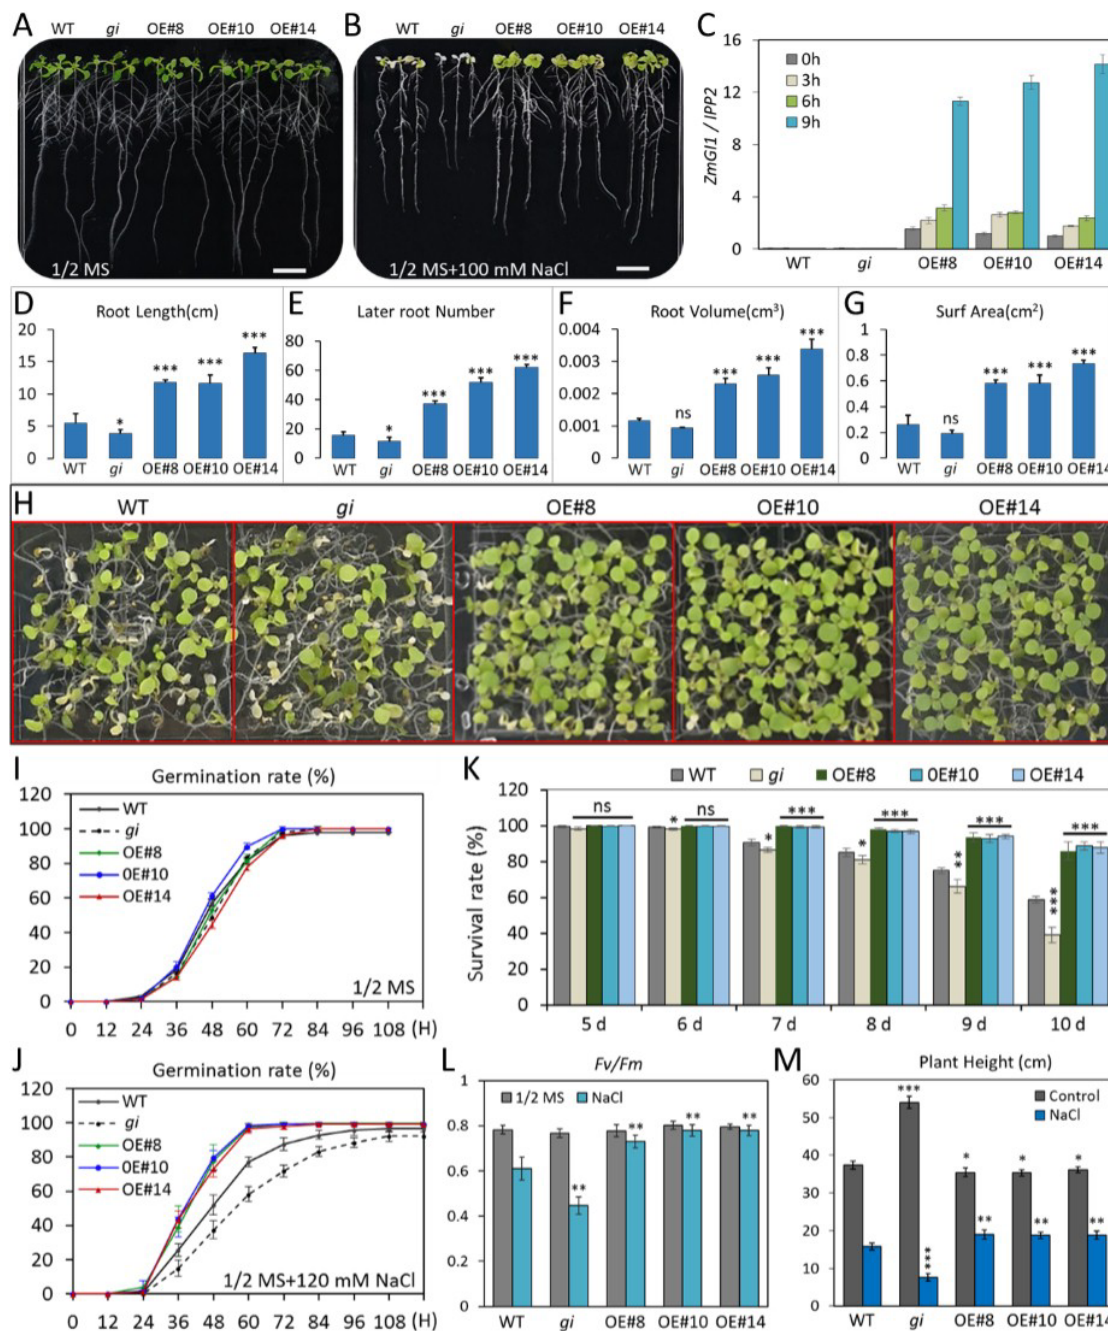

676

677 **Figure 5** Overexpression of *ZmGII* enhances salt tolerance in Arabidopsis seedlings. (A, B)

678 Phenotype of WT, *gi* mutant and transgenic plants of *ZmGII* germinated on 1/2 MS and 1/2 MS with  
 679 NaCl (100 mM) medium. Four-day-old seedlings of different genotypes grown on 1/2 MS medium  
 680 were transferred to new 1/2 MS and 1/2 MS with NaCl (100 mM) medium. Photograph was taken 5  
 681 d and 7 d after the transfer to 1/2 MS and 1/2 MS with NaCl (100 mM) respectively. Scale is 1 cm.

682 (C) The expression levels of *ZmGII* in different genotypes of Arabidopsis; (D-G) The root

683 morphological traits of WT, *gi* and overexpressed *ZmGII* lines under 1/2 MS with 100 mM NaCl



684 stress. Values are means  $\pm$  SD (n = 8). **(H)** Effect of salt stress shock on plant survival. WT, *gi*  
685 mutant and transgenic plants of *ZmGII* germinated on 1/2 MS with NaCl (120 mM) media.  
686 Photograph was taken 10 d after treatment. **(I-J)** Germination rates of WT, *gi* mutant and  
687 over-expressed *ZmGII* lines on 1/2 MS and under salt stress, respectively. Values are means  $\pm$  SD (n  
688 = 5), 64 individual seedlings in each repeat. **(K)** Effect of salt stress on plant survival. WT, *gi* mutant  
689 and transgenic plants of *ZmGII* were sown on 1/2 MS with NaCl (120 mM) medium. Survival rates  
690 of seedlings at the indicated time point after germination were calculated. Values are means  $\pm$  SD (n  
691 = 5). **(L)** The effect of the maximum quantum efficiency ( $F_v/F_m$ ) of PSII changes on salt stress in  
692 WT, *gi* mutant and transgenic plants of *ZmGII*. Seedlings were grown for 12 d under continuous  
693 light with salinity treatment (120 mM NaCl) and then shifted to the dark for 2 h before PSII  
694 measurement. 64 individual seedlings of different genotypes in one culture dish were divided into a  
695 group and generated mean values of  $F_v/F_m$ . The results represent the mean and SD of  $F_v/F_m$   
696 measurements of three times repeats. **(M)** Effects of plant height at mature stage in WT, *gi* mutant  
697 and over-expressed *ZmGII* lines under salt stress. The seeds were sown on 1/2 MS and transferred to  
698 soil and treatment with 150 mM NaCl at the full life cycle of Arabidopsis. Plant height were  
699 calculated from at least 8 individual seedlings. \*,  $P < 0.05$ ; \*\*,  $P < 0.01$ ; \*\*\*,  $P < 0.001$ , ns, not  
700 significant (Student's *t* test).

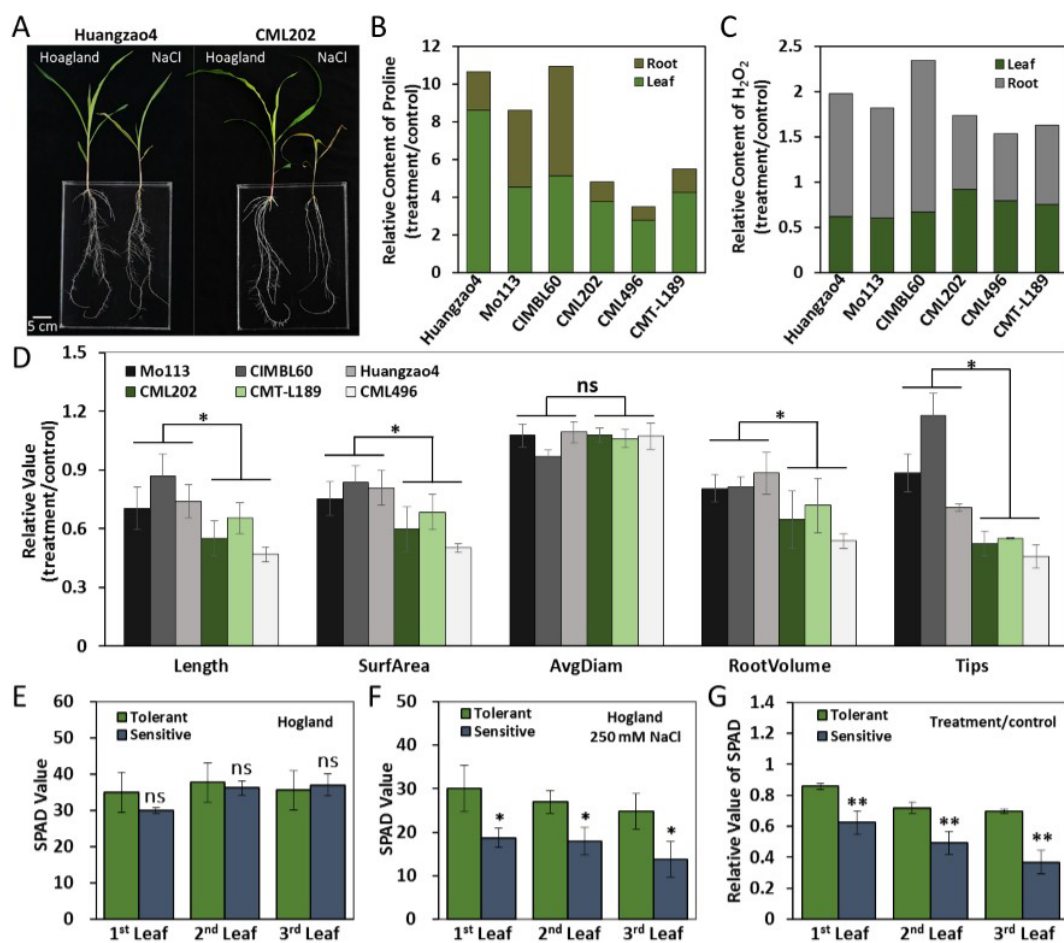

701

702 **Figure 6** Phenotype of seedlings under salt stress in maize. (A) Effects of salinity on maize growth.

703 The extremely salt tolerant and sensitivity maize lines were cultivated with Hoagland solution under

704 neutral photoperiod (light 12 h/12 h dark) for 17 d and transferred to salt stress with 250 mM NaCl.

705 Photographs were taken 7 d after transferred. Scales are 5 cm. (B, C) Relative content of proline (B)

706 and H<sub>2</sub>O<sub>2</sub> (C) in maize seedlings after 7d salt stress, respectively. The ratios were calculated from the

707 treatment and control under both roots and leaves. (D) The relative variation ratio of root

708 morphological traits in maize under 250 mM NaCl stress to control. n = 8 per column. (E-G) The

709 chlorophyll content of salt tolerant and sensitive lines after 3 d salinity treatment.

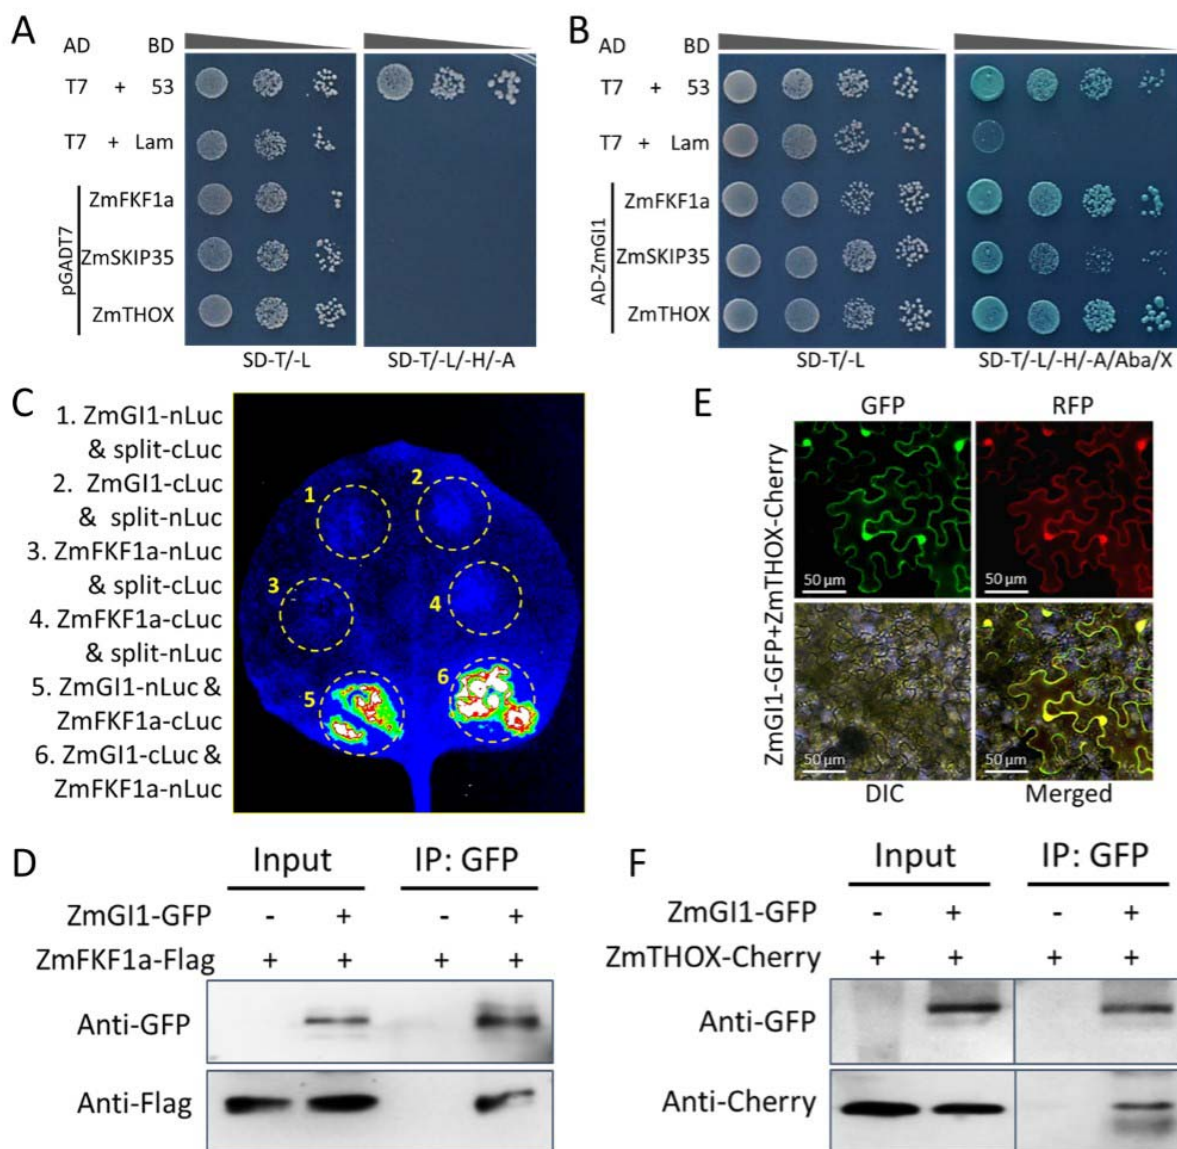

710

711 **Figure 7** Interactions of ZmGI1 with ZmFKF1 and ZmTHOX. (A) Self-activation verification of the  
 712 candidate proteins. (B) ZmGI1 interacts with library screened proteins in yeast two-hybrid assay. (C)  
 713 ZmGI1 interacts with ZmFKF1a in split-luciferase complementation (split-LUC) assay. The  
 714 constructs to express the indicated fusion proteins were transformed to *N. benthamiana* leaves  
 715 through *Agrobacterium* infiltration. Luciferase activity was determined at 48 h after infiltration.  
 716 Three independent repeats were with consistent results. (D) ZmGI1 interacts with ZmFKF1a in  
 717 tobacco by Co-IP. Coimmunoprecipitation assay (Co-IP) showing the interaction between ZmGI1  
 718 and ZmFKF1a. ZmGI1-GFP and ZmFKF1a-Flag were expressed in *N. benthamiana*.  
 719 Immunoprecipitation was performed by using antibody anti-GFP. Immunoblottings were conducted  
 720 using anti-GFP and anti-Flag antibodies. (E) Co-localization of the ZmGI1 and ZmTHOX in *N.*

721 *benthamiana* leaves. ZmGII1 and ZmTHOX were fused with GFP and mCherry, respectively. Bars =  
722 50  $\mu\text{m}$ . (F) ZmGII1 interacts with ZmTHOX in tobacco by Co-IP assay. Plasmids containing  
723 ZmGII1-GFP and ZmTHOX-mCherry were co-transformed into tobacco leaves. Anti-GFP magnetic  
724 beads were used to immunoprecipitate the proteins, which were further analyzed by immunoblotting  
725 with anti-GFP and anti-mCherry antibodies.

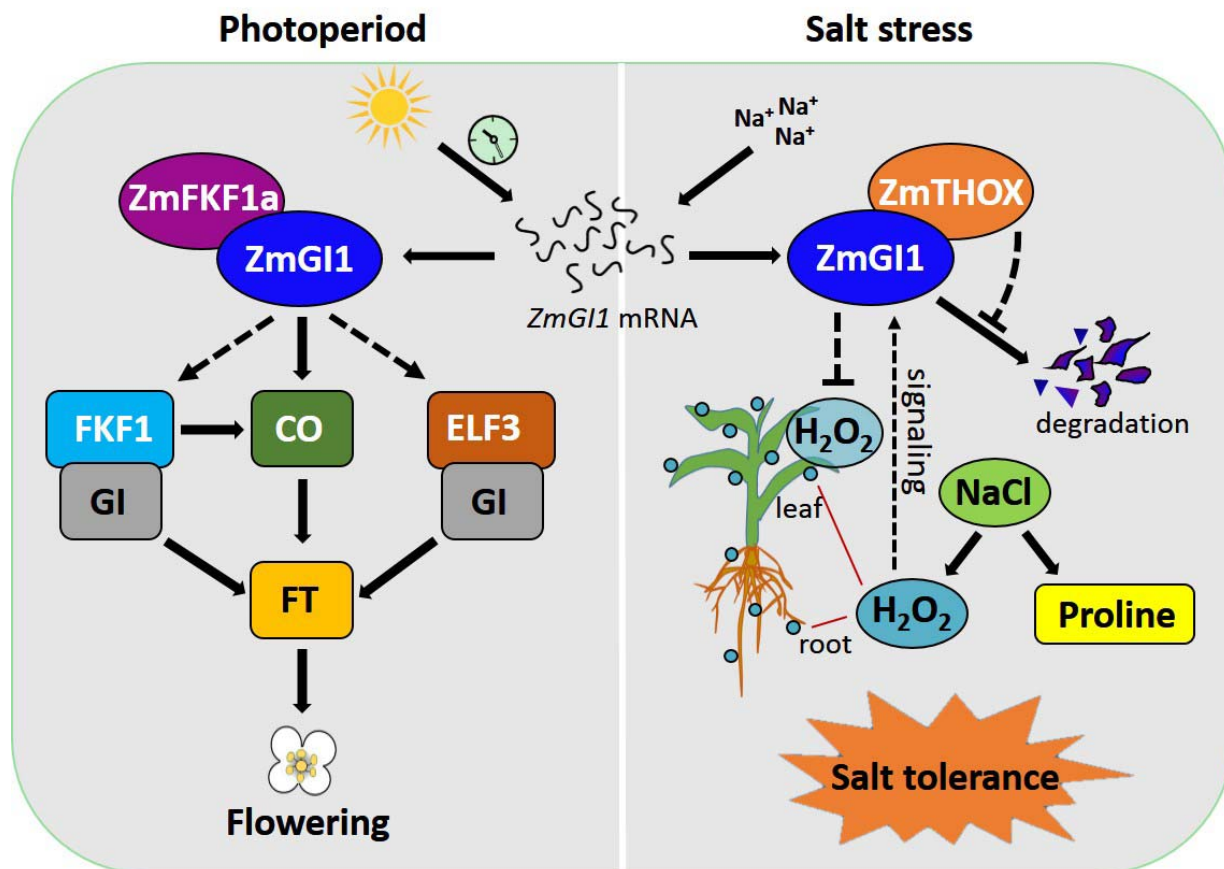

726  
727 **Figure 8** A proposed working model of *ZmGII1*-mediated flowering promoter and salt resistance. The  
728 photoperiodic flowering pathway is on the left. *ZmGII1* interacts with *ZmFKF1a* and promotes  
729 flowering through enhancing *CO* expression. Overexpression of *ZmGII1* up-regulates the expression  
730 of downstream genes including *FKF1*, *ELF3* and *CO*, which will result in accumulation of florigen  
731 and promoted flowering in *Arabidopsis*. *ZmGII1* interacts with *ZmTHOX*, a component of redox  
732 balance pathway is on the right, which belongs to PPPDE peptidase family involved in substrate  
733 deubiquitinating. Salt stress (with NaCl) triggers the up-regulation of *ZmThox* under the stimulation  
734 of  $\text{H}_2\text{O}_2$  in roots, then act on the stabilization of *ZmGII1* and the elimination of  $\text{H}_2\text{O}_2$  in leaves. While  
735 at the transcriptional level, photoperiodic-insensitive lines have low *ZmGII1* expression. Salt stress  
736 resulting in the accumulation of proline in plant that enhance salt stress tolerance. The black solid  
737 arrow indicates that the data is from this study.

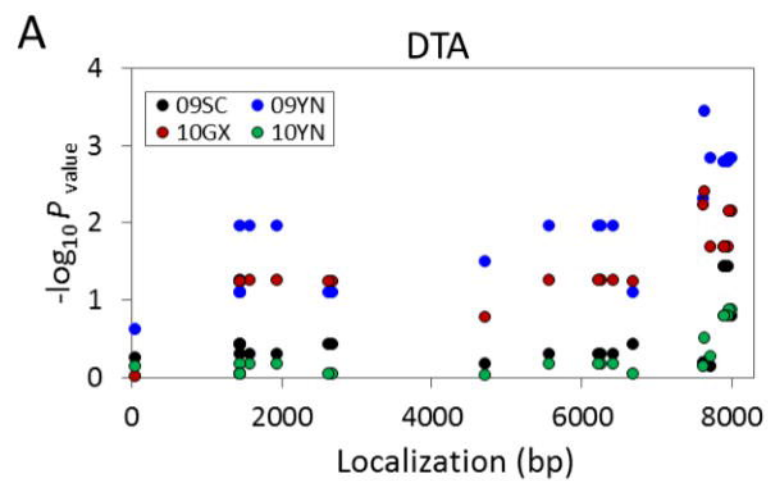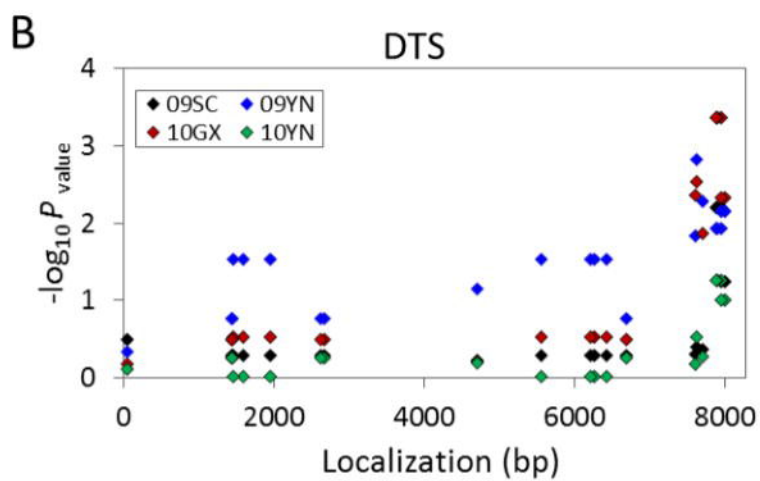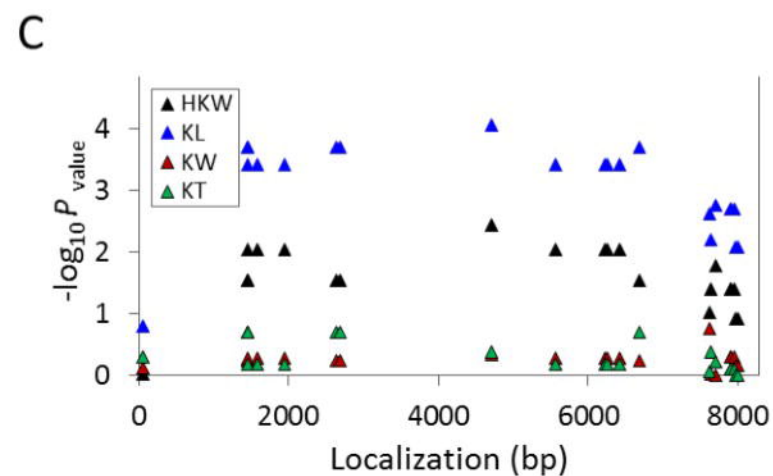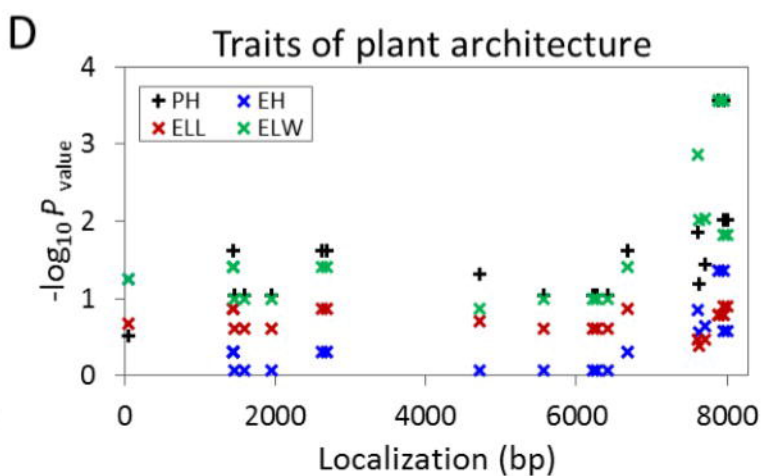

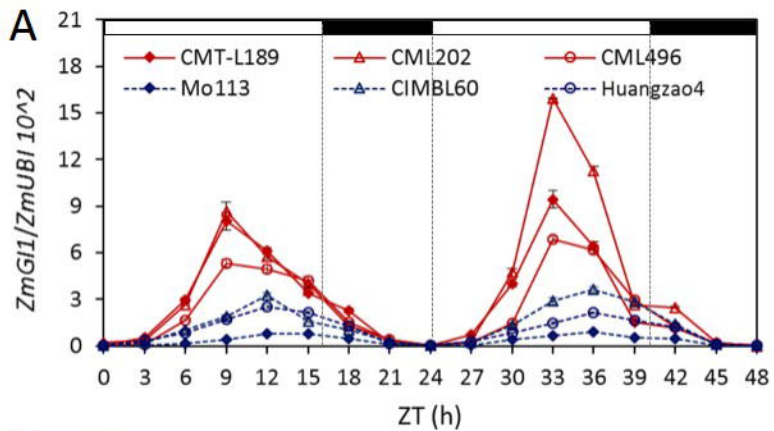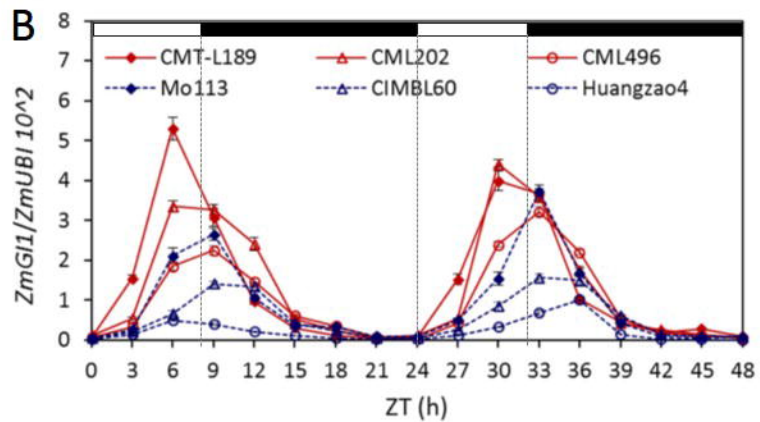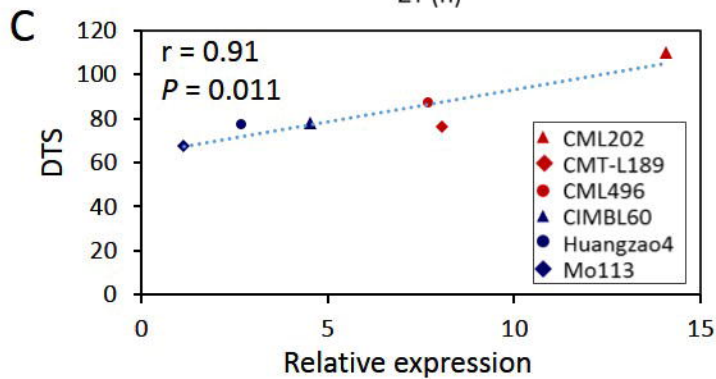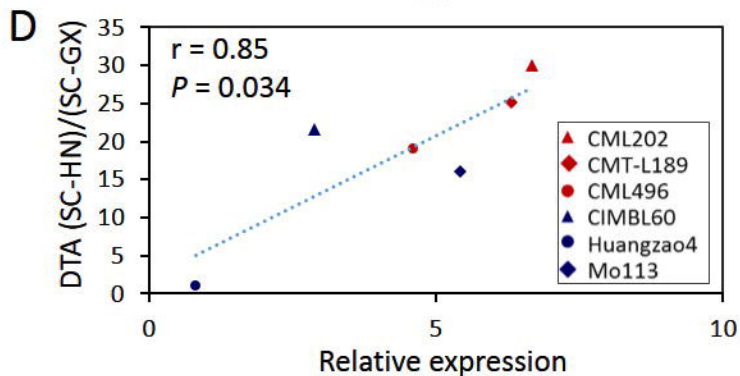

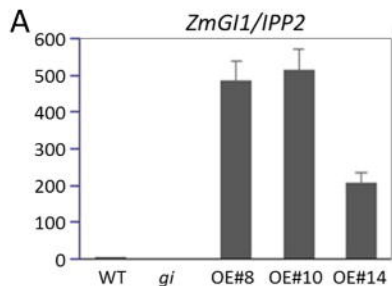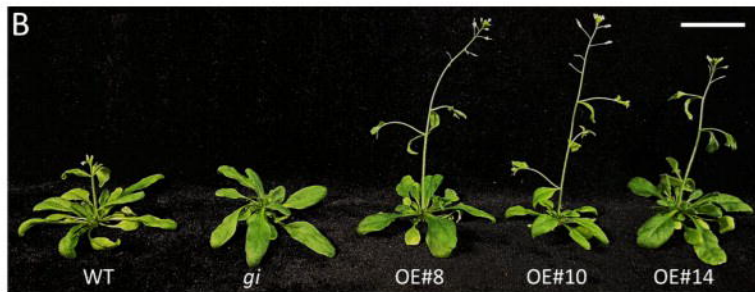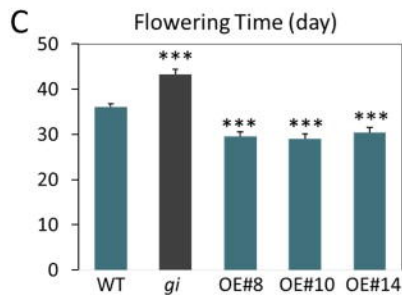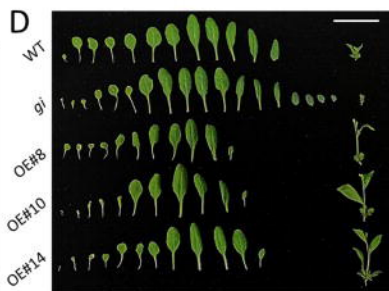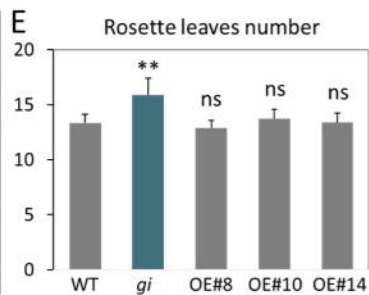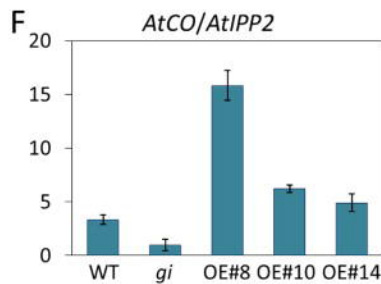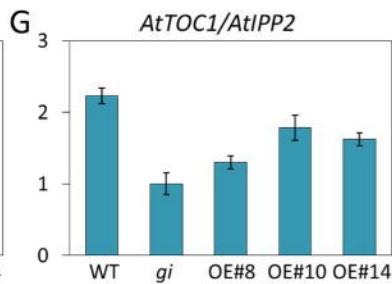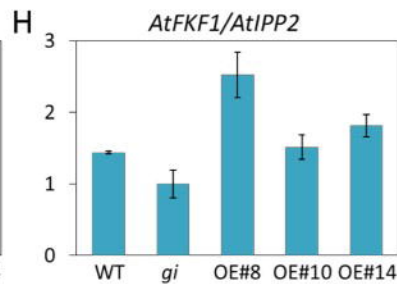

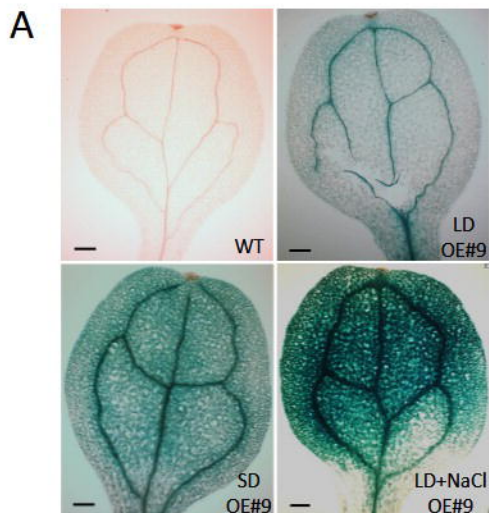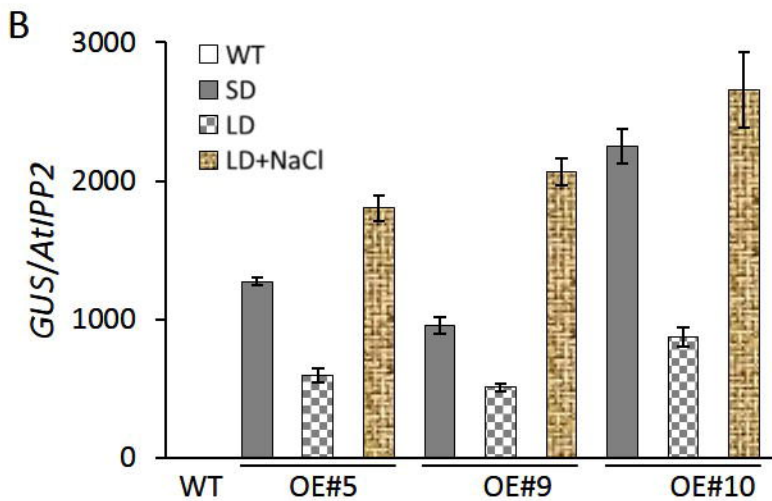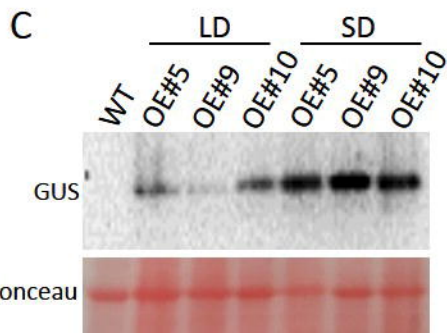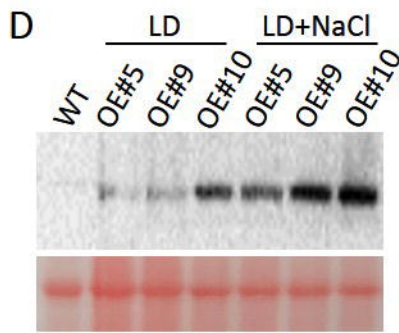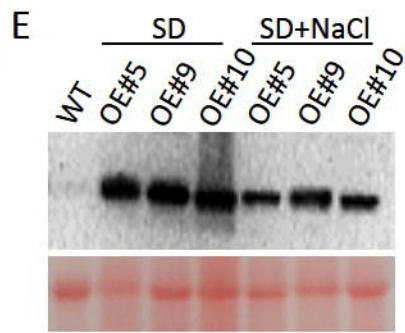



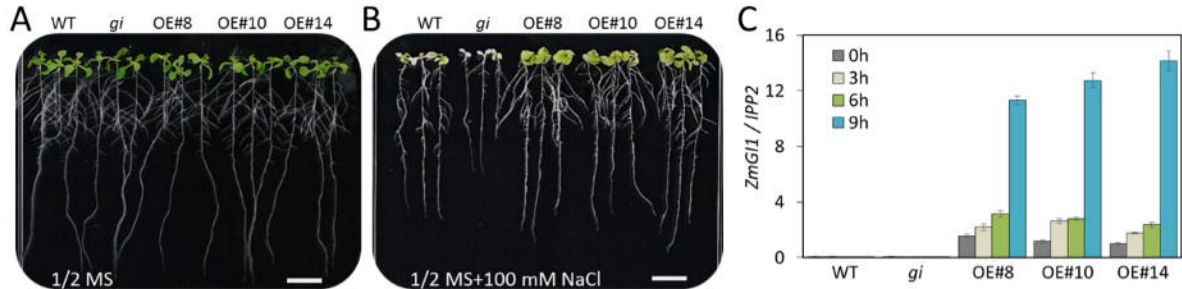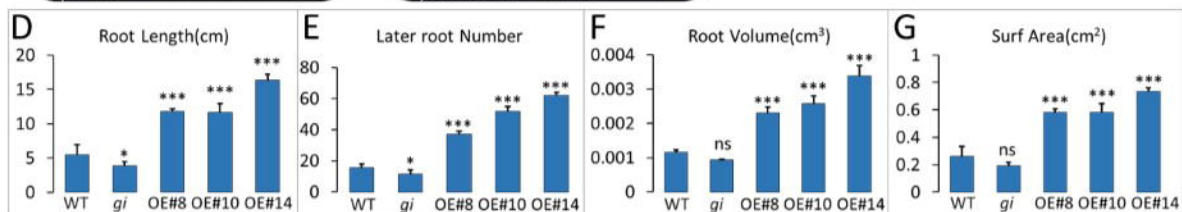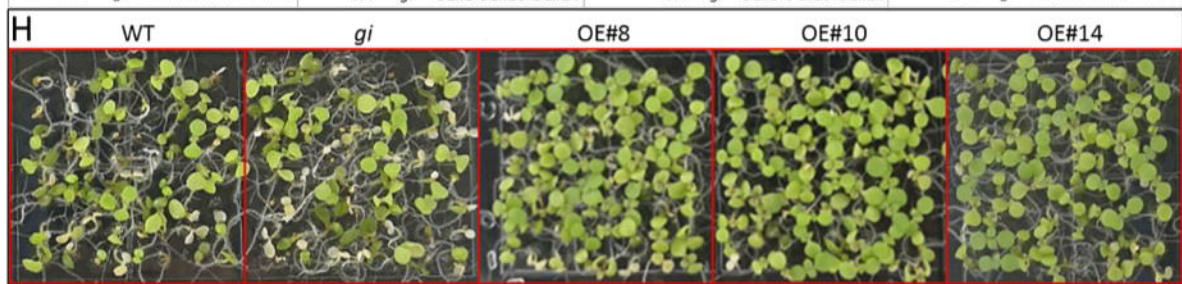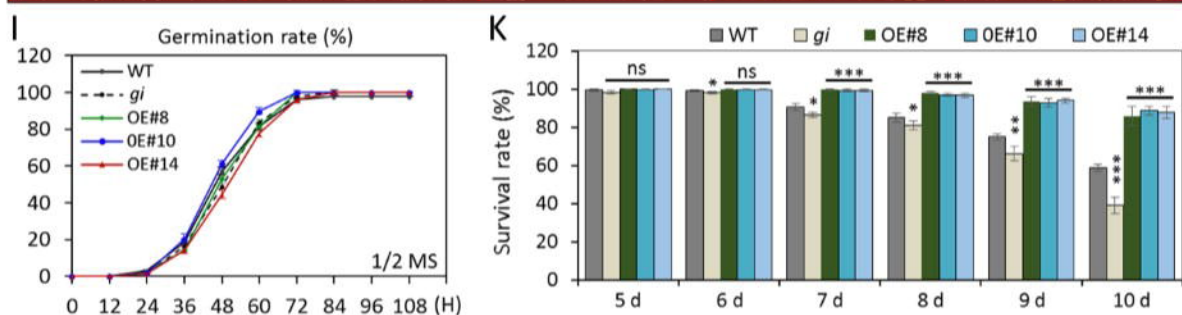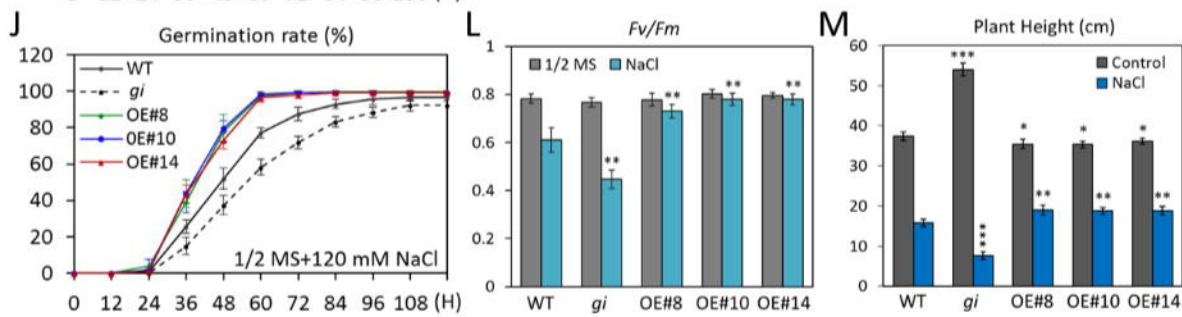

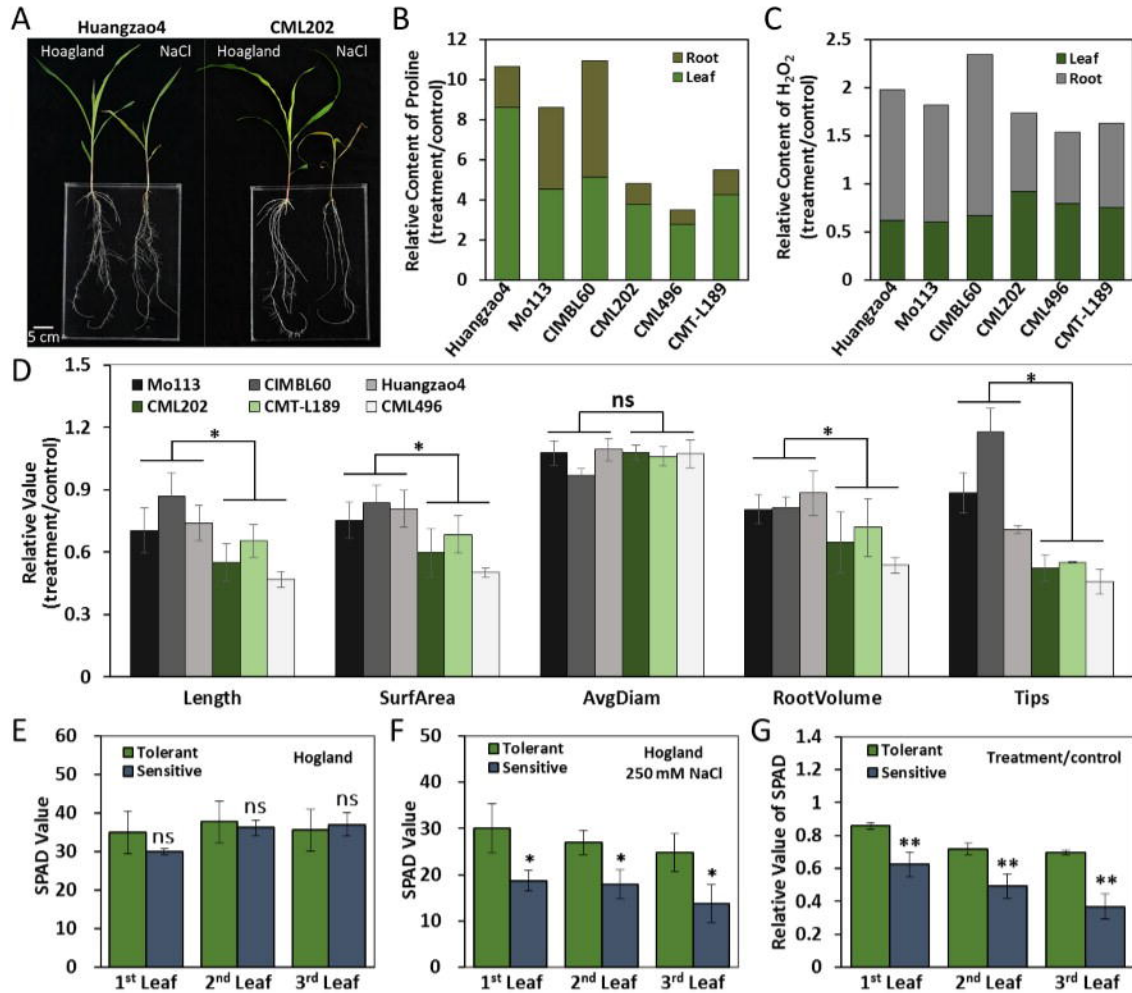

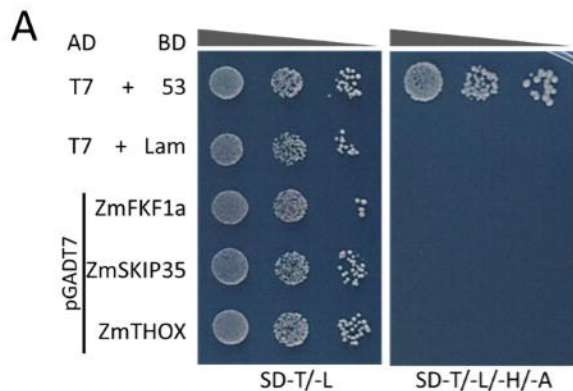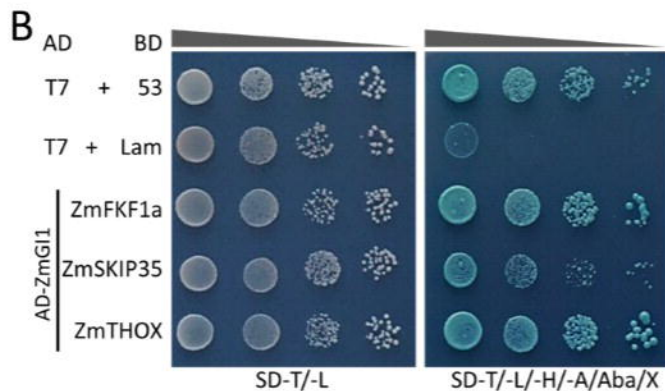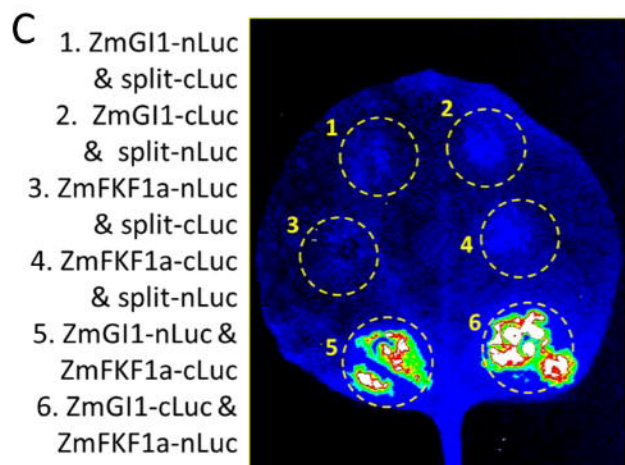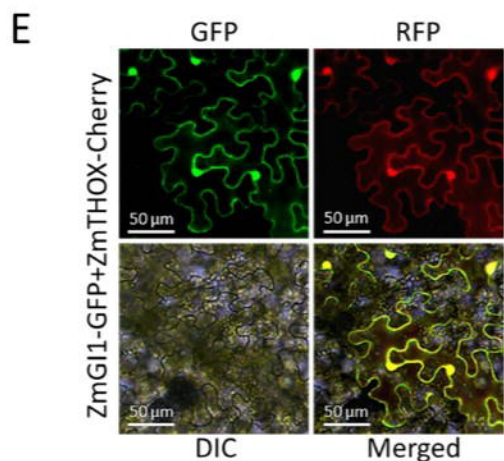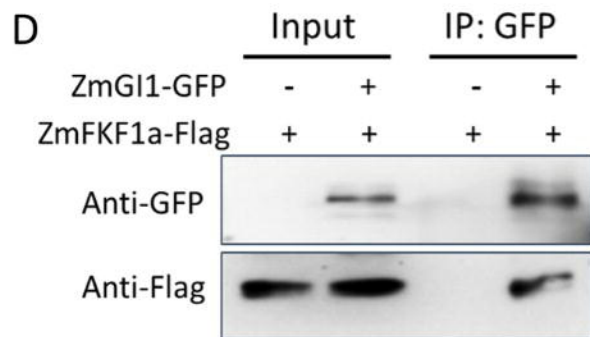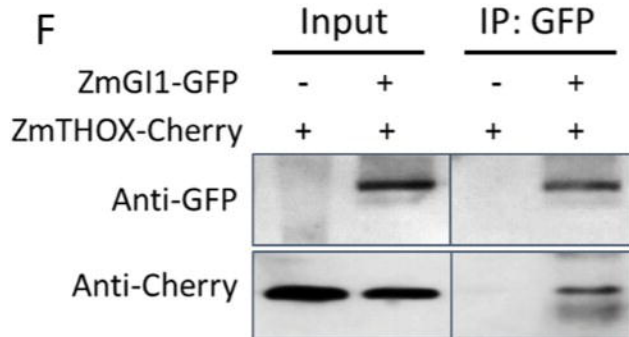

## Photoperiod

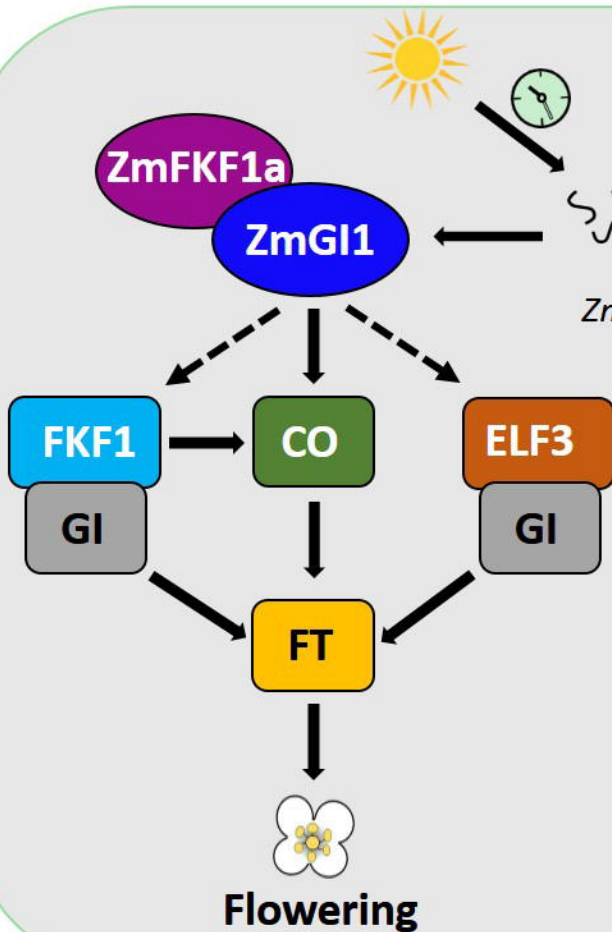

## Salt stress

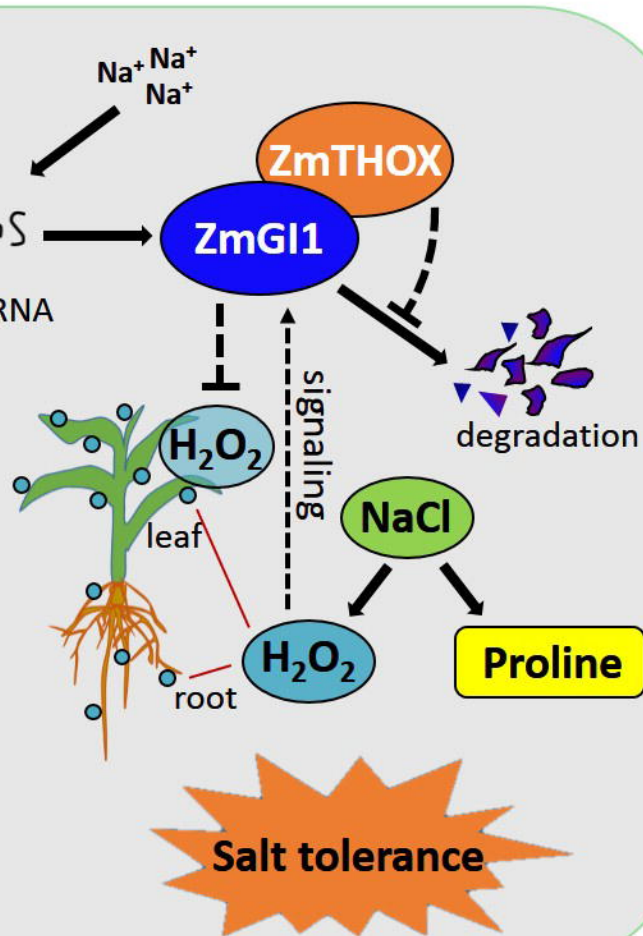

Source: https://www.biorxiv.org/content/biorxiv/early/2021/05/13/2021.05.12.443837.full.pdf
